# Supplementary material
Source: PubMed Central journal article supplement (PMC10233724)
Supplement: NIHMS1899263-supplement-si.pdf [file NIHMS1899263-supplement-si.pdf]

Supporting Information for

**Computational Investigation of a Series of Small Molecules as  
Potential Compounds for Lysyl hydroxylase-2 (LH2) Inhibition**

Yazdan Maghsoud,<sup>1</sup> Erik Antonio Vázquez-Montelongo,<sup>2</sup> Xudong Yang,<sup>3</sup> Chengwen Liu,<sup>3</sup> Zhifeng Jing,<sup>3</sup> Juhoon Lee,<sup>4</sup> Matthew Harger,<sup>3</sup> Ally K. Smith,<sup>5</sup> Miguel Espinoza,<sup>5</sup> Hou-Fu Guo,<sup>6</sup> Jonathan M. Kurie,<sup>7</sup> Kevin N. Dalby,<sup>\*,4</sup> Pengyu Ren,<sup>\*,3</sup> and G. Andrés Cisneros<sup>\*,1,8</sup>

<sup>1</sup>*Department of Chemistry and Biochemistry, The University of Texas at Dallas, Richardson, Texas 75080, USA*

<sup>2</sup>*Department of Physical Medicine and Rehabilitation, University of Texas Southwestern Medical Center, Dallas, Texas 75390, USA*

<sup>3</sup>*Department of Biomedical Engineering, The University of Texas at Austin, Austin, Texas 78712, USA*

\*E-mail: [pren@utexas.edu](mailto:pren@utexas.edu)

<sup>4</sup>*Division of Chemical Biology and Medicinal Chemistry, College of Pharmacy, The University of Texas at Austin, Austin, Texas 78712, USA*

\*E-mail: [dalby@austin.utexas.edu](mailto:dalby@austin.utexas.edu)

<sup>5</sup>*Department of Chemistry, University of North Texas, Denton, Texas 76201, USA*

<sup>6</sup>*Department of Molecular and Cellular Biochemistry, College of Medicine, The University of Kentucky, Lexington, Kentucky 40536, USA*

<sup>7</sup>*Department of Thoracic/Head and Neck Medical Oncology, The University of Texas MD Anderson Cancer Center, Houston, Texas 77005, USA.*

<sup>8</sup>*Department of Physics, The University of Texas at Dallas, Richardson, Texas 75080, USA*

\*E-mail: [andres@utdallas.edu](mailto:andres@utdallas.edu)

**Table S1.** Calculated components of the interaction energy ( $\Delta\Delta E^{Interact.}$ ) for all the lead compounds. All the values are in kcal mol<sup>-1</sup>.

| ID | Compound | $\Delta E_{Lig./Env.}^{Interact.}$ | $\Delta E_{Lig./Wat.}^{Interact.}$ | $\Delta\Delta E^{Interact.}$ |
|----|----------|------------------------------------|------------------------------------|------------------------------|
| 1  | cpd1     | -36.91                             | -15.87                             | -21.04                       |
| 2  | cpd1p    | -169.37                            | -71.30                             | -98.08                       |
| 3  | cpd2     | 61.91                              | -18.07                             | 79.98                        |
| 4  | cpd2p    | -139.67                            | -70.01                             | -69.66                       |
| 5  | cpd3     | -58.86                             | -18.07                             | -40.79                       |
| 6  | cpd4     | -68.94                             | -19.51                             | -49.43                       |
| 7  | cpd5     | -39.21                             | -35.46                             | -3.754                       |
| 8  | cpd6     | -50.43                             | -16.37                             | -34.06                       |
| 9  | cpd7     | -38.72                             | -19.08                             | -19.64                       |
| 10 | cpd8     | -36.55                             | -16.80                             | -19.75                       |
| 11 | cpd9     | -45.03                             | -16.57                             | -28.46                       |
| 12 | cpd10    | -54.83                             | -15.25                             | -39.58                       |
| 13 | cpd11    | 70.63                              | -14.68                             | 85.31                        |
| 14 | cpd12    | -162.42                            | -78.25                             | -84.18                       |
| 15 | cpd13    | -45.51                             | -18.89                             | -26.62                       |
| 16 | S50356   | -201.14                            | -89.56                             | -111.6                       |
| 17 | cpd1ph   | -60.50                             | -17.15                             | -43.35                       |
| 18 | cpd1php  | -185.25                            | -70.18                             | -115.02                      |
| 19 | cpd2ph   | -52.94                             | -19.31                             | -33.59                       |
| 20 | cpd14    | -170.55                            | -78.53                             | -91.97                       |
| 21 | cpd15    | -163.91                            | -78.73                             | -85.17                       |
| 22 | cpd16    | -176.05                            | -80.32                             | -95.68                       |
| 23 | cpd17    | -204.49                            | -92.56                             | -111.94                      |
| 24 | cpd18    | -166.96                            | -80.51                             | -86.40                       |
| 25 | cpd19    | -203.87                            | -83.42                             | -120.48                      |
| 26 | cpd20    | -182.89                            | -78.32                             | -104.58                      |
| 27 | cpd21    | -186.64                            | -78.33                             | -108.27                      |
| 28 | cpd22    | -176.64                            | -79.21                             | -97.40                       |
| 29 | cpd23    | -177.91                            | -84.92                             | -92.98                       |
| 30 | cpd24p   | -185.67                            | -66.40                             | -119.30                      |
| 31 | cpd25    | -44.398                            | -22.83                             | -21.57                       |
| 32 | cpd25p   | -194.48                            | -69.96                             | -124.54                      |
| 33 | cpd26    | -51.754                            | -16.84                             | -34.86                       |
| 34 | cpd26p   | -212.59                            | -68.71                             | -143.89                      |
| 35 | cpd27    | -63.005                            | -17.84                             | -45.16                       |
| 36 | cpd27p   | -212.94                            | -68.18                             | -144.72                      |
| 37 | c28a     | -220.98                            | -73.64                             | -147.36                      |
| 38 | c28b     | -278.25                            | -78.85                             | -199.35                      |
| 39 | c28c     | -203.21                            | -76.34                             | -126.86                      |
| 40 | c28e     | -129.47                            | -67.91                             | -61.587                      |
| 41 | c28f     | -202.30                            | -71.18                             | -131.12                      |
| 42 | c2d      | -103.65                            | -65.83                             | -37.87                       |
| 43 | c24      | -114.18                            | -65.97                             | -48.22                       |
| 44 | c25      | -190.52                            | -68.03                             | -122.46                      |

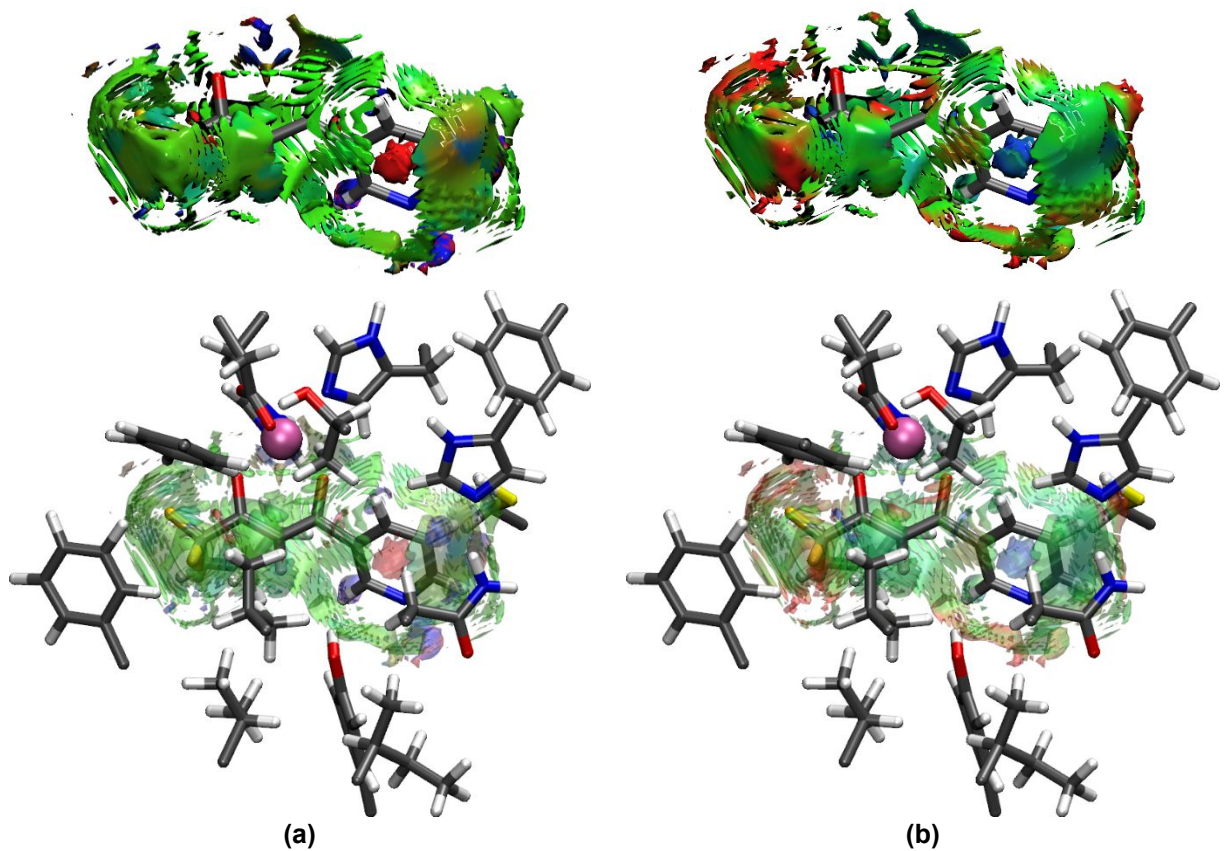

**Figure S1.** (a) Averaged non-covalent index (aNCI) and (b) thermal fluctuation index (TFI) analyses for cpd1p (ID: 2). The isosurface cutoff for NCI and TFI is 0.4 au, and the data is plotted in the color range  $-0.05 < \text{sign}(\lambda_2)\rho < 0.05$  au.

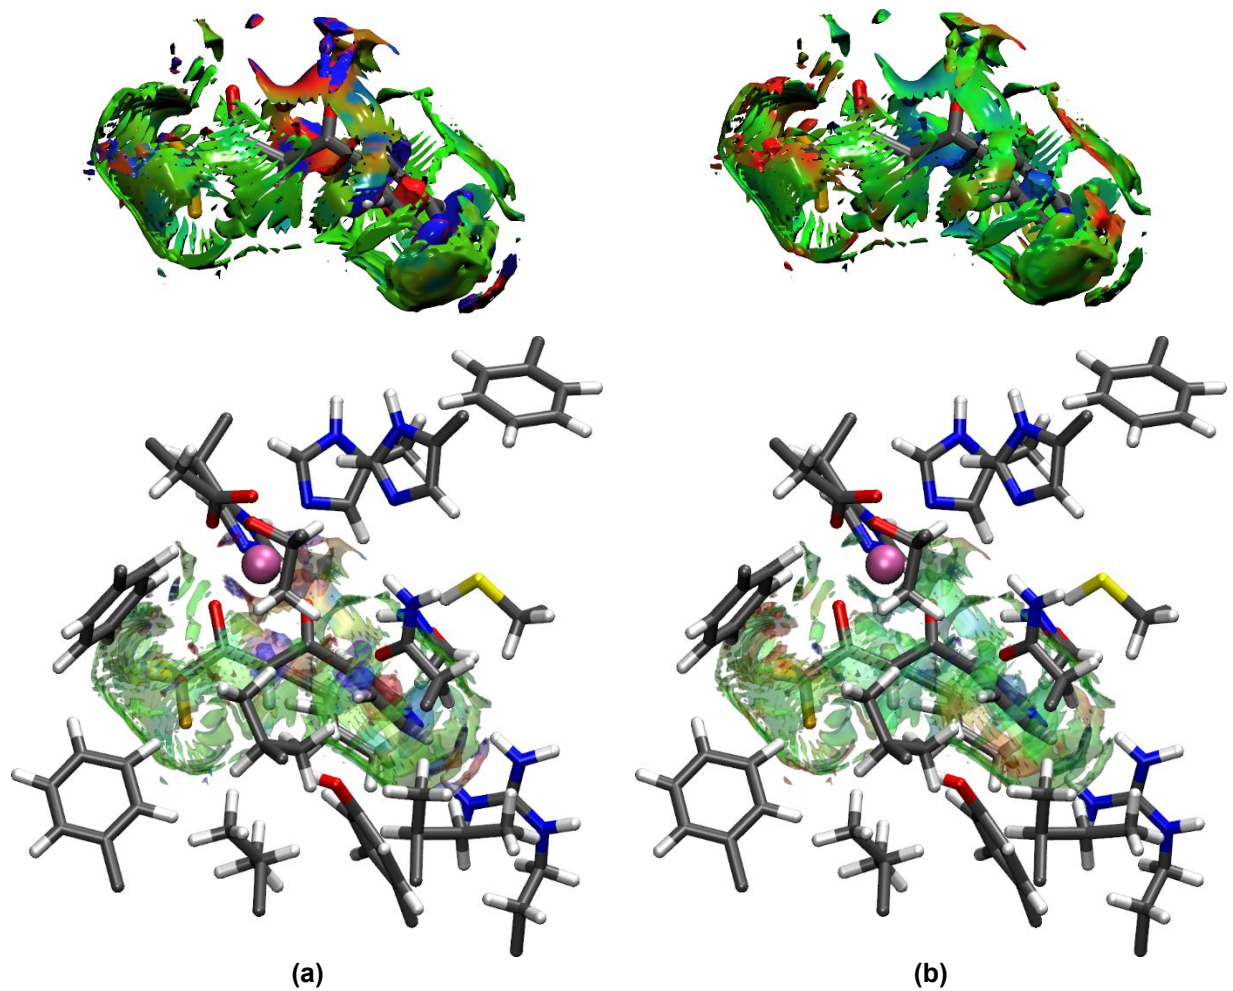

**Figure S2.** (a) Averaged non-covalent index (aNCI) and (b) thermal fluctuation index (TFI) analyses for cpd2p (ID: 4). The isosurface cutoff for NCI and TFI is 0.4 au, and the data is plotted in the color range  $-0.05 < \text{sign}(\lambda_2)\rho < 0.05$  au.

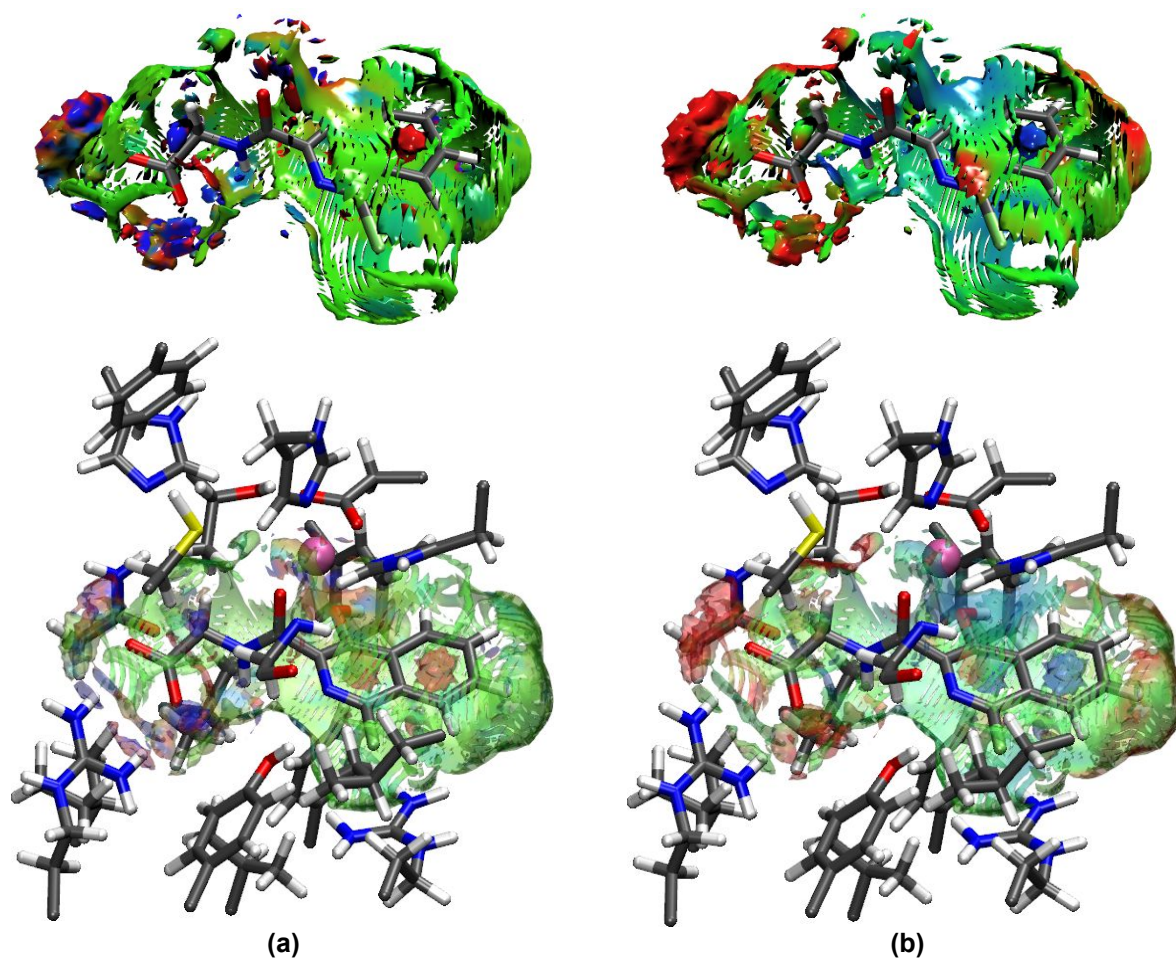

**Figure S3.** (a) Averaged non-covalent index (aNCI) and (b) thermal fluctuation index (TFI) analyses for S50356 (ID: 16). The isosurface cutoff for NCI and TFI is 0.4 au, and the data is plotted in the color range  $-0.05 < \text{sign}(\lambda_2)\rho < 0.05$  au.

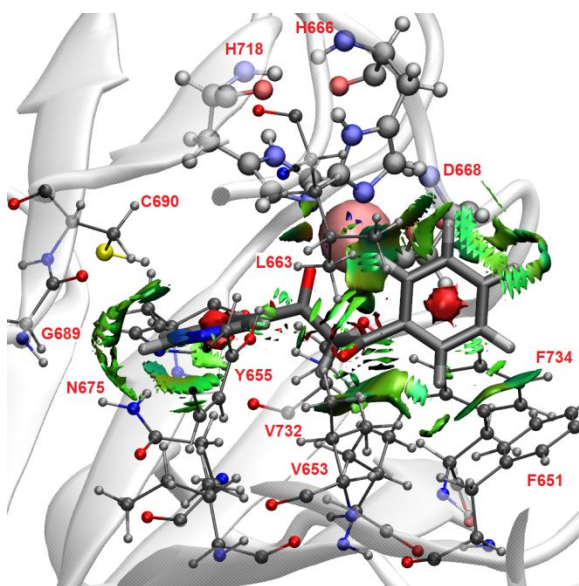

17- cpd1ph

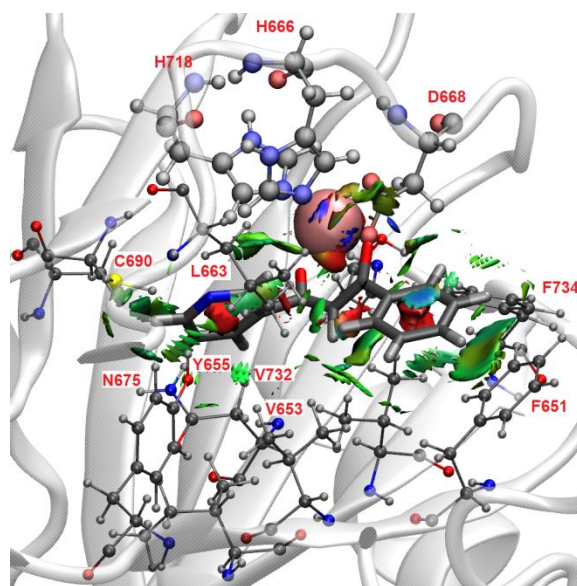

18- cpd1ph

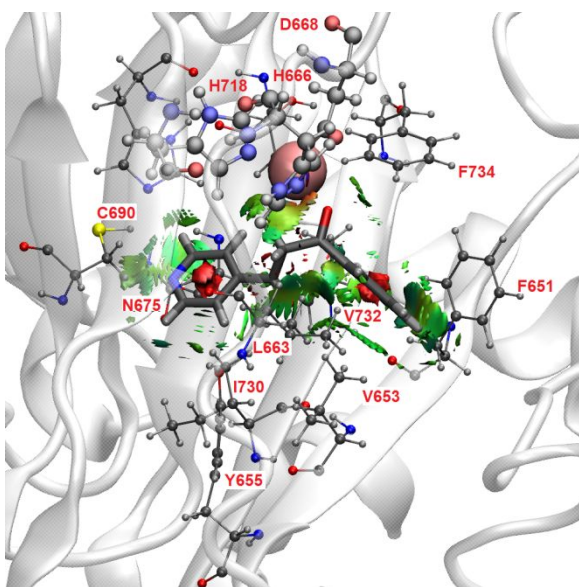

19- cpd2ph

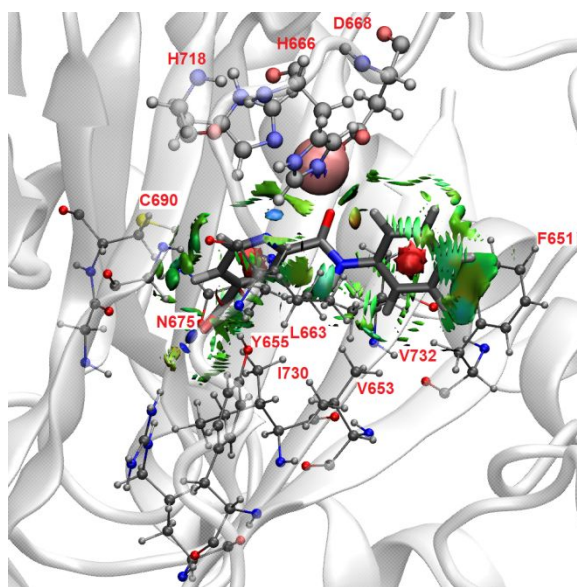

20- cpd14

**Figure S4.** The non-covalent interactions (NCI) plot between the lead compounds of the second set and the amino acid residues. The isosurface cutoff is 0.4 au, and the data is plotted in the color range  $-0.05 < \text{sign}(\lambda_2)\rho < 0.05$  au.

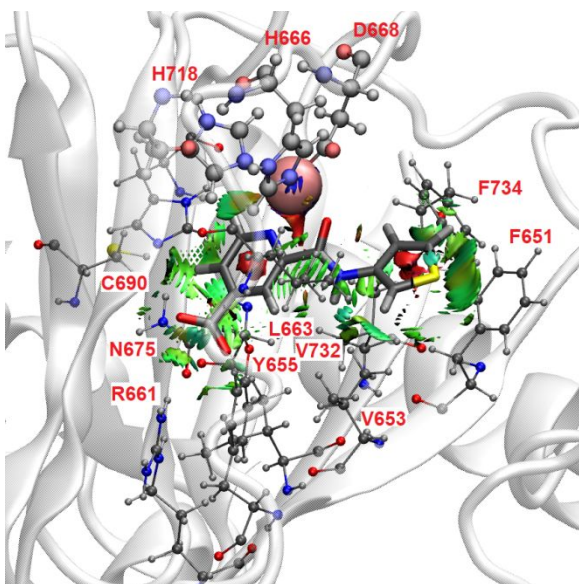

21- cpd15

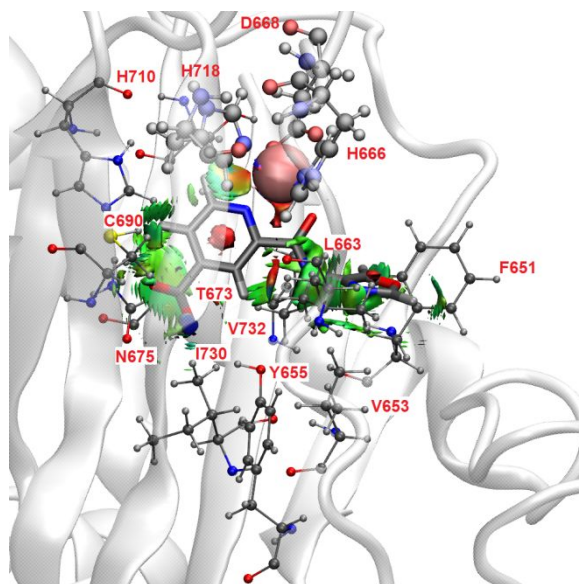

22- cpd16

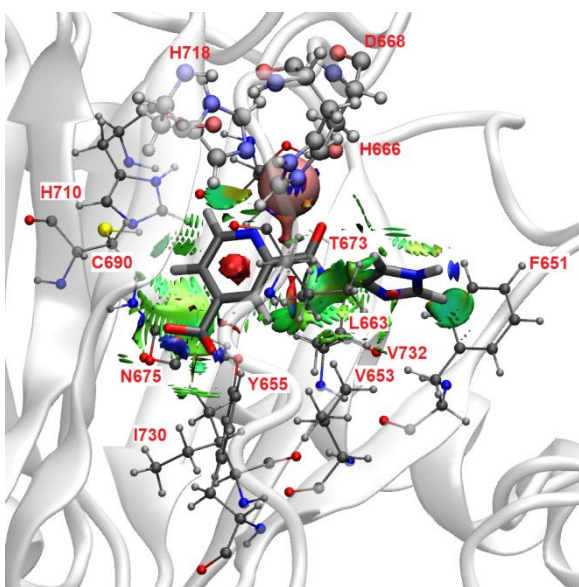

23- cpd17

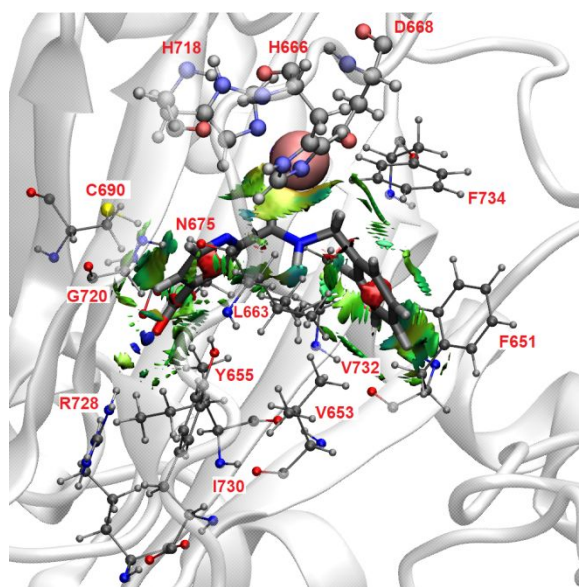

24- cpd18

Figure S4. Continued.

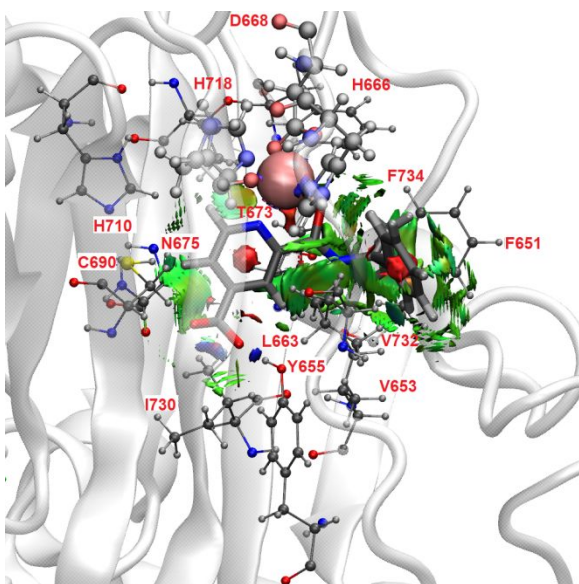

25- cpd19

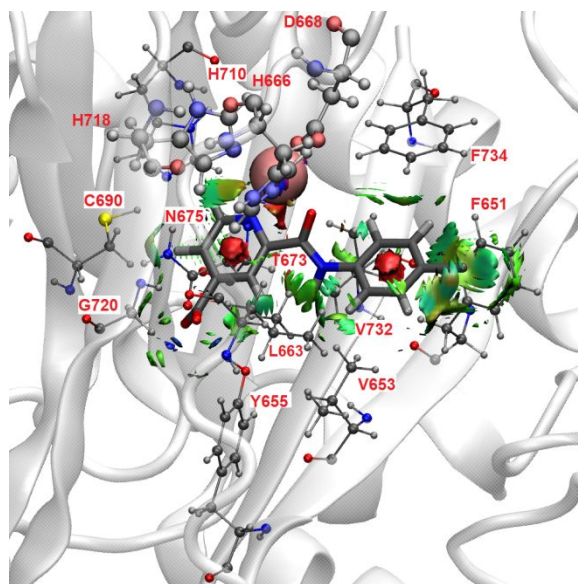

26- cpd20

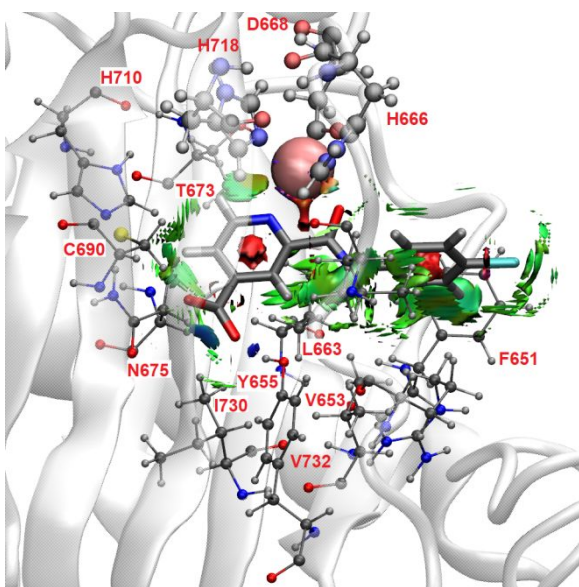

27- cpd21

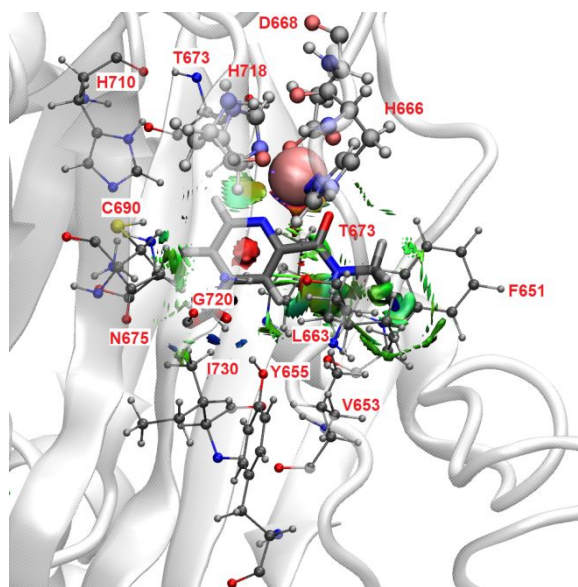

28- cpd22

Figure S4. Continued.



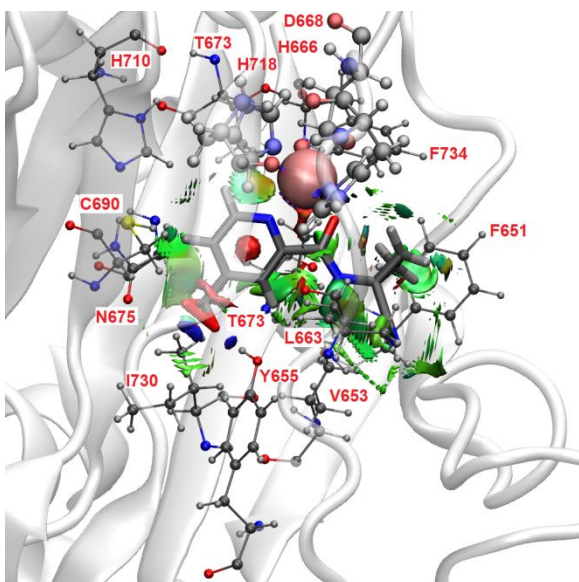

29- cpd23

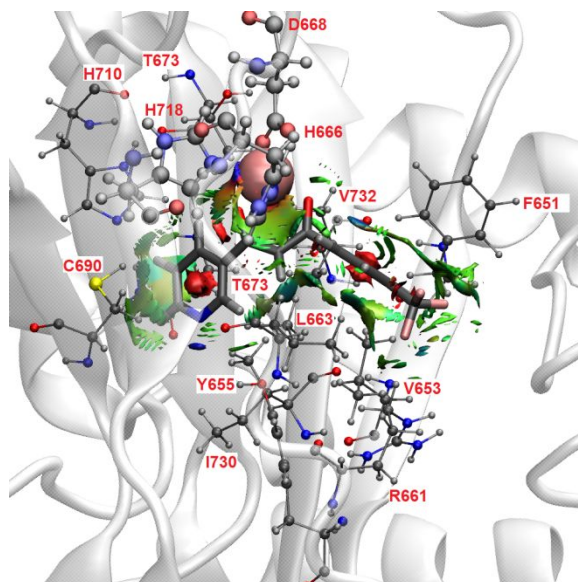

30- cpd24p

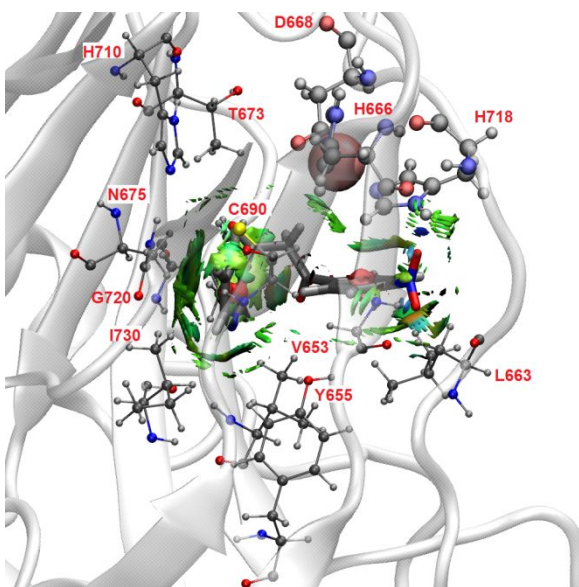

31- cpd25

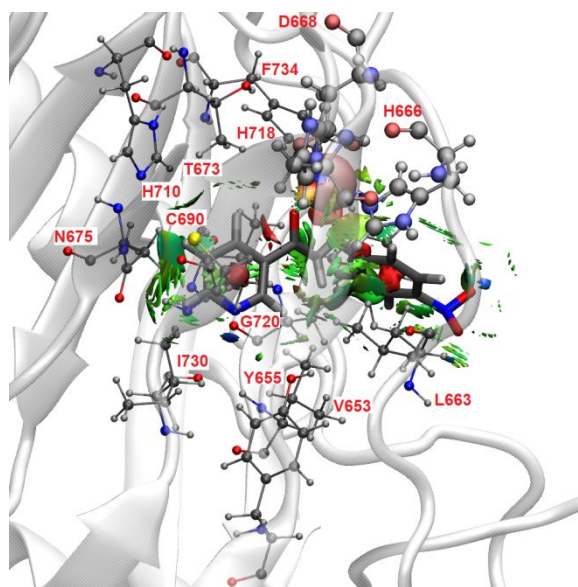

32- cpd25p

Figure S4. Continued.

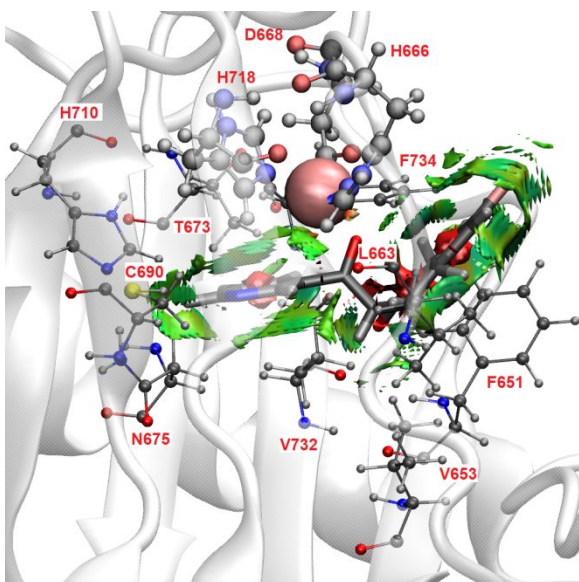

33- cpd26

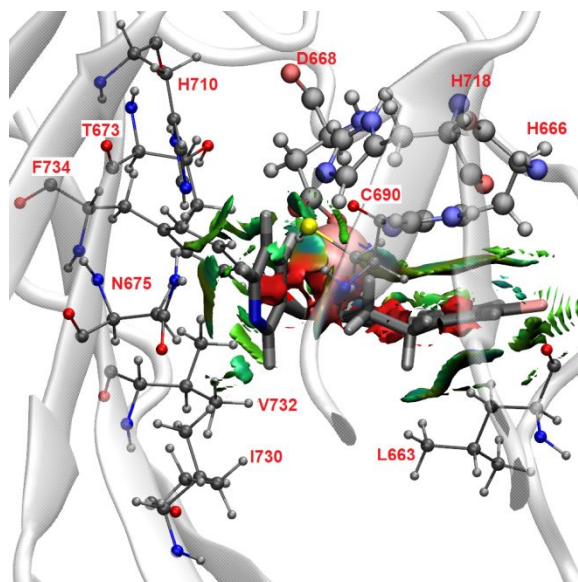

34- cpd26p

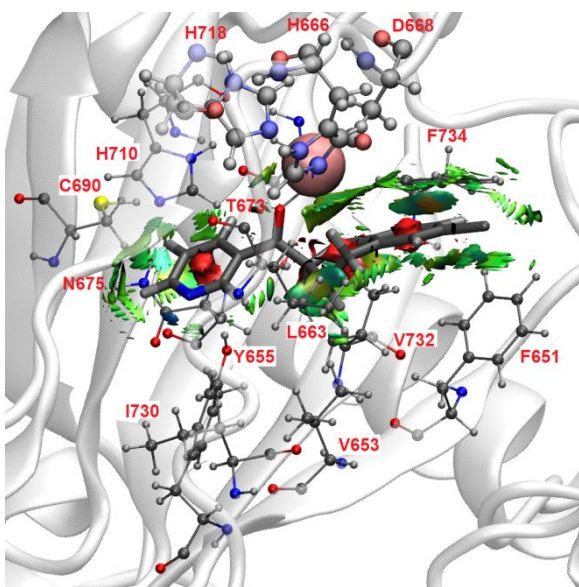

35- cpd27

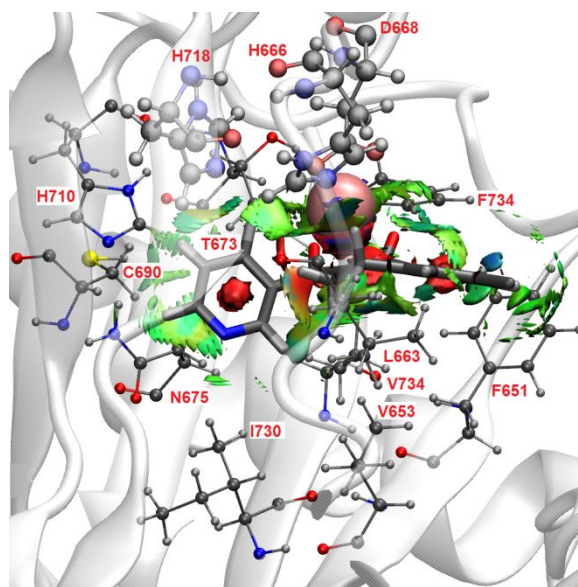

36- cpd27p

Figure S4. Continued.

**Table S2.** List of the amino acid residues showing non-covalent interactions (NCI) with each compound of the second series (ID: 17–36). “✓” means the residue has NCI with the ligand.

| ID | Compound | Non-covalent interacting residues |      |      |      |      |      |      |      |      |      |      |      |      |
|----|----------|-----------------------------------|------|------|------|------|------|------|------|------|------|------|------|------|
|    |          | F651                              | V653 | Y655 | R661 | L663 | T673 | N675 | C690 | H710 | G720 | R728 | I730 | V732 |
| 17 | cpd1ph   | ✓                                 | ✓    | ✓    |      | ✓    | ✓    | ✓    | ✓    | ✓    |      | ✓    | ✓    | ✓    |
| 18 | cpd1php  | ✓                                 | ✓    | ✓    |      | ✓    | ✓    | ✓    | ✓    |      |      | ✓    | ✓    | ✓    |
| 19 | cpd2ph   | ✓                                 | ✓    | ✓    |      | ✓    | ✓    | ✓    | ✓    |      |      | ✓    | ✓    | ✓    |
| 20 | cpd14    | ✓                                 | ✓    | ✓    |      | ✓    |      | ✓    | ✓    |      | ✓    | ✓    | ✓    |      |
| 21 | cpd15    | ✓                                 | ✓    | ✓    | ✓    | ✓    |      | ✓    | ✓    |      | ✓    | ✓    | ✓    | ✓    |
| 22 | cpd16    | ✓                                 | ✓    | ✓    |      | ✓    | ✓    | ✓    | ✓    |      |      | ✓    | ✓    |      |
| 23 | cpd17    | ✓                                 | ✓    | ✓    |      | ✓    | ✓    | ✓    | ✓    |      |      | ✓    | ✓    |      |
| 24 | cpd18    | ✓                                 | ✓    | ✓    |      | ✓    |      | ✓    | ✓    |      | ✓    | ✓    | ✓    | ✓    |
| 25 | cpd19    | ✓                                 | ✓    | ✓    |      | ✓    | ✓    | ✓    | ✓    |      |      | ✓    | ✓    | ✓    |
| 26 | cpd20    | ✓                                 | ✓    | ✓    |      | ✓    |      | ✓    | ✓    |      | ✓    |      | ✓    | ✓    |
| 27 | cpd21    | ✓                                 | ✓    | ✓    |      | ✓    | ✓    | ✓    | ✓    |      |      | ✓    | ✓    |      |
| 28 | cpd22    | ✓                                 | ✓    | ✓    |      | ✓    | ✓    | ✓    | ✓    |      | ✓    | ✓    | ✓    |      |
| 29 | cpd23    | ✓                                 | ✓    | ✓    |      | ✓    | ✓    | ✓    | ✓    |      |      | ✓    | ✓    | ✓    |
| 30 | cpd24p   | ✓                                 | ✓    | ✓    | ✓    | ✓    | ✓    | ✓    | ✓    |      |      | ✓    | ✓    |      |
| 31 | cpd25    |                                   | ✓    | ✓    |      | ✓    | ✓    | ✓    | ✓    |      | ✓    | ✓    | ✓    |      |
| 32 | cpd25p   | ✓                                 | ✓    | ✓    |      | ✓    | ✓    | ✓    | ✓    |      |      | ✓    | ✓    | ✓    |
| 33 | cpd26    | ✓                                 | ✓    |      |      | ✓    | ✓    | ✓    | ✓    |      |      |      | ✓    | ✓    |
| 34 | cpd26p   |                                   |      |      |      | ✓    | ✓    | ✓    | ✓    |      |      | ✓    | ✓    | ✓    |
| 35 | cpd27    | ✓                                 | ✓    | ✓    |      | ✓    | ✓    | ✓    | ✓    |      |      | ✓    | ✓    | ✓    |
| 36 | cpd27p   | ✓                                 | ✓    |      |      | ✓    | ✓    | ✓    | ✓    |      |      | ✓    | ✓    | ✓    |

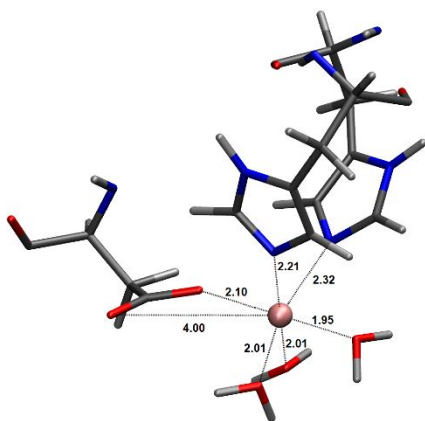

Cluster 1, Frame 100, Abundance 20%

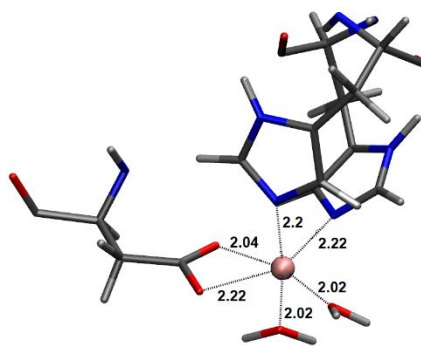

Cluster 2, Frame 8, Abundance 6%

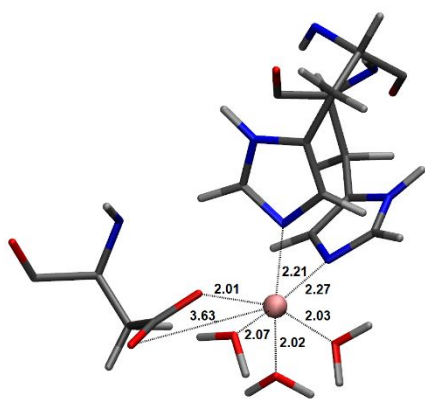

Cluster 3, Frame 91, Abundance 21%

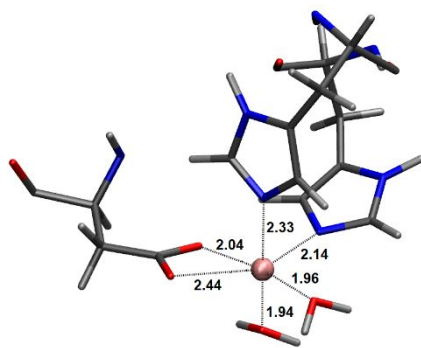

Cluster 4, Frame 9, Abundance 18%

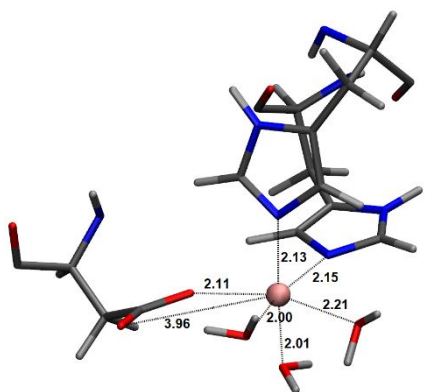

Cluster 5, Frame 93, Abundance 6%

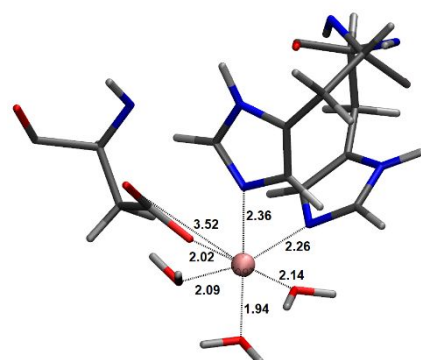

Cluster 6, Frame 78, Abundance 29%

**Figure S5.** Close-up showing the distances between Fe(II) and residues of the active site in each representative structure of the apoenzyme. The MM region is not shown for more clarity.

**Table S3.** Involved residues in the calculated O<sub>2</sub>-transporting tunnels for the apoenzyme. The “√” shows the presence of the residue in the tunnel of interest.

| Residue                  | Selected representatives and the corresponding tunnels |      |       |       |       |        |      |      |       |       |       |        |      |       |       |       |        |
|--------------------------|--------------------------------------------------------|------|-------|-------|-------|--------|------|------|-------|-------|-------|--------|------|-------|-------|-------|--------|
|                          | 8-t1 <sup>1</sup>                                      | 9-t1 | 78-t1 | 91-t1 | 93-t1 | 100-t1 | 8-t2 | 9-t2 | 78-t2 | 91-t2 | 93-t2 | 100-t2 | 8-t3 | 78-t3 | 91-t3 | 93-t3 | 100-t3 |
| F651                     | √                                                      | √    | √     |       | √     | √      | √    | √    | √     | √     | √     | √      | √    | √     |       |       |        |
| <b>V653</b> <sup>2</sup> | √                                                      | √    | √     | √     | √     | √      | √    | √    | √     | √     | √     | √      | √    | √     | √     | √     | √      |
| <b>Y655</b>              | √                                                      | √    | √     | √     | √     | √      | √    | √    | √     | √     | √     | √      | √    | √     | √     | √     | √      |
| S656                     |                                                        |      |       |       |       |        |      |      |       |       |       |        |      | √     |       |       |        |
| P657                     |                                                        |      |       |       |       |        |      |      |       |       |       |        |      | √     |       |       |        |
| R659                     |                                                        |      |       |       |       |        |      |      |       |       |       |        |      | √     |       |       | √      |
| Q660                     |                                                        |      |       |       |       |        |      | √    |       |       |       |        | √    | √     | √     |       | √      |
| R661                     |                                                        |      |       |       |       |        | √    | √    |       | √     | √     |        | √    | √     | √     |       | √      |
| S662                     |                                                        |      |       |       |       |        |      | √    |       |       |       |        | √    | √     | √     | √     | √      |
| <b>L663</b>              | √                                                      | √    | √     | √     | √     | √      | √    | √    | √     | √     | √     | √      | √    | √     | √     | √     | √      |
| R664                     |                                                        |      |       |       |       |        |      |      |       |       |       |        |      |       |       | √     |        |
| P665                     |                                                        |      |       |       |       |        |      |      |       |       |       |        |      |       |       | √     |        |
| <b>H666</b>              | √                                                      | √    | √     | √     | √     | √      | √    | √    | √     | √     | √     | √      | √    | √     | √     | √     | √      |
| <b>D668</b>              | √                                                      | √    | √     | √     | √     | √      | √    | √    | √     | √     | √     | √      | √    | √     | √     | √     | √      |
| <b>T673</b>              | √                                                      | √    | √     | √     | √     | √      | √    | √    | √     | √     | √     | √      | √    | √     | √     | √     | √      |
| I674                     | √                                                      | √    |       |       |       |        | √    | √    | √     |       |       |        | √    |       |       |       |        |
| <b>N675</b>              | √                                                      | √    | √     | √     | √     | √      | √    | √    | √     | √     | √     | √      | √    | √     | √     | √     | √      |
| G688                     |                                                        |      |       |       |       |        |      | √    |       |       |       |        | √    | √     | √     |       | √      |
| G689                     |                                                        |      |       |       |       |        |      | √    |       | √     |       |        | √    | √     | √     |       | √      |
| <b>C690</b>              | √                                                      | √    | √     | √     | √     | √      | √    | √    | √     | √     | √     | √      | √    | √     | √     | √     | √      |
| K691                     |                                                        |      |       |       |       |        |      | √    |       |       |       |        |      | √     |       |       |        |
| F692                     | √                                                      |      |       |       |       |        | √    |      |       |       |       |        | √    |       |       |       |        |
| <b>H710</b>              | √                                                      | √    | √     | √     | √     | √      | √    | √    | √     | √     | √     | √      | √    | √     | √     | √     | √      |
| <b>H718</b>              | √                                                      | √    | √     | √     | √     | √      | √    | √    | √     | √     | √     | √      | √    | √     | √     | √     | √      |
| <b>E719</b>              | √                                                      | √    | √     |       | √     | √      | √    | √    | √     |       |       |        | √    | √     | √     | √     | √      |
| <b>G720</b>              | √                                                      | √    | √     | √     |       | √      | √    | √    |       | √     | √     | √      | √    | √     | √     | √     | √      |
| L721                     |                                                        |      |       |       |       |        |      | √    |       |       |       |        | √    | √     | √     |       | √      |
| P722                     |                                                        |      |       |       |       |        |      | √    |       |       |       |        | √    | √     | √     |       | √      |
| V723                     |                                                        |      |       |       |       |        |      | √    |       |       |       |        | √    | √     | √     |       | √      |
| R728                     |                                                        |      |       |       |       |        |      |      |       |       |       |        | √    | √     | √     |       | √      |
| <b>I730</b>              | √                                                      | √    | √     | √     |       | √      | √    | √    | √     | √     | √     |        | √    | √     | √     | √     | √      |
| <b>V732</b>              | √                                                      | √    | √     | √     | √     | √      | √    | √    | √     | √     | √     | √      | √    | √     | √     | √     | √      |
| <b>F734</b>              | √                                                      | √    | √     | √     | √     | √      | √    | √    | √     | √     | √     | √      | √    | √     | √     | √     | √      |

<sup>1</sup> 8-t1 means tunnel number 1 of representative number 8.

<sup>2</sup> Residues in bold text have a presence percentage of more than ~%85 in the calculated tunnels.

**Table S4.** Important statistics of the calculated O<sub>2</sub>-transporting tunnels for the apoenzyme and holoenzyme with compounds of the third set.

| Str. | Tunnel No. | O <sub>2</sub> -transporting tunnels statistics |                                          |                               |                           |                       |                   |
|------|------------|-------------------------------------------------|------------------------------------------|-------------------------------|---------------------------|-----------------------|-------------------|
|      |            | Tunnel Availability (%) <sup>1</sup>            | Availability difference (%) <sup>2</sup> | Average Bottleneck Radius (Å) | Average Tunnel Length (Å) | Priority <sup>3</sup> | Cost <sup>4</sup> |
| apo  | tunnel_001 | 63%                                             | –                                        | 1.93                          | 2.29                      | 0.92                  | 0.08              |
|      | tunnel_002 | 51%                                             | –                                        | 1.72                          | 5.80                      | 0.83                  | 0.19              |
|      | tunnel_003 | 32%                                             | –                                        | 0.94                          | 10.16                     | 0.52                  | 0.66              |
| c28a | tunnel_001 | 41%                                             | 35%                                      | 1.65                          | 2.85                      | 0.87                  | 0.14              |
|      | tunnel_002 | 35%                                             | 31%                                      | 1.82                          | 4.34                      | 0.85                  | 0.16              |
|      | tunnel_003 | 26%                                             | 19%                                      | 1.20                          | 21.33                     | 0.49                  | 0.70              |
| c28b | tunnel_001 | 39%                                             | 38%                                      | 2.21                          | 2.44                      | 0.93                  | 0.07              |
|      | tunnel_002 | 37%                                             | 27%                                      | 1.44                          | 15.13                     | 0.70                  | 0.35              |
|      | tunnel_003 | 29%                                             | 9%                                       | 1.19                          | 19.81                     | 0.51                  | 0.68              |
| c28c | tunnel_001 | 40%                                             | 36%                                      | 2.02                          | 1.49                      | 0.92                  | 0.08              |
|      | tunnel_002 | 27%                                             | 47%                                      | 2.02                          | 4.42                      | 0.89                  | 0.12              |
|      | tunnel_003 | 31%                                             | 3%                                       | 1.35                          | 23.84                     | 0.51                  | 0.68              |
| c28e | tunnel_001 | 31%                                             | 51%                                      | 2.42                          | 4.69                      | 0.90                  | 0.10              |
|      | tunnel_002 | 30%                                             | 41%                                      | 1.43                          | 18.82                     | 0.61                  | 0.49              |
|      | tunnel_003 | 19%                                             | 41%                                      | 1.02                          | 22.39                     | 0.50                  | 0.70              |
| c28f | tunnel_001 | 44%                                             | 30%                                      | 2.46                          | 1.32                      | 0.95                  | 0.05              |
|      | tunnel_002 | 30%                                             | 41%                                      | 1.51                          | 14.7                      | 0.69                  | 0.36              |
|      | tunnel_003 | 33%                                             | 3%                                       | 0.97                          | 19.5                      | 0.49                  | 0.72              |
| c2d  | tunnel_001 | 46%                                             | 27%                                      | 2.20                          | 2.42                      | 0.94                  | 0.07              |
|      | tunnel_002 | 29%                                             | 43%                                      | 1.81                          | 4.29                      | 0.89                  | 0.11              |
|      | tunnel_003 | 20%                                             | 38%                                      | 1.42                          | 15.62                     | 0.64                  | 0.44              |
| c24  | tunnel_001 | 39%                                             | 38%                                      | 2.52                          | 2.33                      | 0.94                  | 0.07              |
|      | tunnel_002 | 27%                                             | 47%                                      | 0.95                          | 15.13                     | 0.53                  | 0.63              |
|      | tunnel_003 | 20%                                             | 38%                                      | 0.98                          | 17.57                     | 0.49                  | 0.71              |
| c25  | tunnel_001 | 40%                                             | 36%                                      | 2.55                          | 2.48                      | 0.94                  | 0.07              |
|      | tunnel_002 | 24%                                             | 53%                                      | 1.54                          | 15.54                     | 0.65                  | 0.43              |
|      | tunnel_003 | 22%                                             | 31%                                      | 1.22                          | 19.46                     | 0.59                  | 0.53              |

<sup>1</sup> The availability percentage of each tunnel is calculated by considering the probability of the tunnel's existence in the corresponding representative and the population abundance of the representative.

<sup>2</sup> Availability difference percentage shows the difference between the availability of each tunnel in the apo- and the holoenzyme.

<sup>3</sup> Cost of each tunnel is defined as the balance between the width and length of the tunnel (Å).

<sup>4</sup> Priority of each tunnel is calculated by  $e^{-cost}$ . The tunnels with a cost of less than ~0.7 (wide and short) and a priority higher than ~0.5 were considered the threshold for selecting the tunnels.

**Table S5.** Procollagen-lysine,2-oxoglutarate 5-dioxygenase proteins from various organisms aligned with Human LH2 (O00469). The Clustal Omega program embedded in UniProtKB was used for the multiple sequence alignment between the modeled LH2 and the selected proteins.

| No. | Entry             | Gene names | Organism                                                       |
|-----|-------------------|------------|----------------------------------------------------------------|
| 1   | Q02809            | PLOD1      | Homo sapiens (Human)                                           |
| 2   | <b>O00469*</b>    | PLOD2      | Homo sapiens (Human)                                           |
| 3   | O60568            | PLOD3      | Homo sapiens (Human)                                           |
| 4   | <b>A0A8D1JHC2</b> | PLOD2      | Sus scrofa (Pig)                                               |
| 5   | A0A8D0JHE2        | PLOD2      | Sus scrofa (Pig)                                               |
| 6   | A0A8D0ZY95        | PLOD2      | Sus scrofa (Pig)                                               |
| 7   | A0A8D0VHD4        | PLOD2      | Sus scrofa (Pig)                                               |
| 8   | A0A8D1KIW7        | PLOD2      | Sus scrofa (Pig)                                               |
| 9   | A0A8D0VHY0        | PLOD2      | Sus scrofa (Pig)                                               |
| 10  | A0A8D1P4F3        | PLOD3      | Sus scrofa (Pig)                                               |
| 11  | A0A8D0K2Z4        | PLOD3      | Sus scrofa (Pig)                                               |
| 12  | A0A8D1K1H1        | PLOD3      | Sus scrofa (Pig)                                               |
| 13  | Q63321            | PLOD1      | Rattus norvegicus (Rat)                                        |
| 14  | <b>Q811A3</b>     | PLOD2      | Rattus norvegicus (Rat)                                        |
| 15  | Q5U367            | PLOD3      | Rattus norvegicus (Rat)                                        |
| 16  | Q9R0E2            | PLOD1      | Mus musculus (Mouse)                                           |
| 17  | <b>Q9R0B9</b>     | PLOD2      | Mus musculus (Mouse)                                           |
| 18  | Q9R0E1            | PLOD3      | Mus musculus (Mouse)                                           |
| 19  | <b>A0A8C9KGF3</b> | PLOD2      | Panthera tigris altaica (Siberian tiger)                       |
| 20  | A0A8C9KH69        | PLOD2      | Panthera tigris altaica (Siberian tiger)                       |
| 21  | A0A8C9KQ19        | PLOD2      | Panthera tigris altaica (Siberian tiger)                       |
| 22  | <b>A0A8C8XUH6</b> | PLOD2      | Panthera leo (Lion)                                            |
| 23  | A0A8C8XVR4        | PLOD2      | Panthera leo (Lion)                                            |
| 24  | <b>A0A8C6D658</b> | PLOD2      | Moschus moschiferus (Siberian musk deer) (Moschus sibiricus)   |
| 25  | A0A8C6CWN0        | PLOD2      | Moschus moschiferus (Siberian musk deer) (Moschus sibiricus)   |
| 26  | A0A8C6D4L0        | PLOD3      | Moschus moschiferus (Siberian musk deer) (Moschus sibiricus)   |
| 27  | A0A8B7KEY5        | PLOD1      | Camelus ferus (Wild bactrian camel) (Camelus bactrianus ferus) |
| 28  | <b>A0A8B8TKG6</b> | PLOD2      | Camelus ferus (Wild bactrian camel) (Camelus bactrianus ferus) |
| 29  | A0A8B8TKG9        | PLOD2      | Camelus ferus (Wild bactrian camel) (Camelus bactrianus ferus) |
| 30  | A0A8B8YU86        | PLOD1      | Balaenoptera musculus (Blue whale)                             |
| 31  | A0A8B8YLE1        | PLOD1      | Balaenoptera musculus (Blue whale)                             |
| 32  | <b>A0A8C0CCB7</b> | PLOD2      | Balaenoptera musculus (Blue whale)                             |
| 33  | A0A8C0CFQ9        | PLOD2      | Balaenoptera musculus (Blue whale)                             |
| 34  | A0A8B8VB21        | PLOD3      | Balaenoptera musculus (Blue whale)                             |
| 35  | A0A8B9CT93        | PLOD1      | Anser brachyrhynchus (Pink-footed goose)                       |
| 36  | A0A8B9CR79        | PLOD1      | Anser brachyrhynchus (Pink-footed goose)                       |
| 37  | <b>A0A8B9BIE8</b> | PLOD2      | Anser brachyrhynchus (Pink-footed goose)                       |
| 37  | <b>O77588</b>     | PLOD1      | Bos taurus (Bovine)                                            |
| 39  | <b>P24802</b>     | PLOD1      | Gallus gallus (Chicken)                                        |
| 40  | <b>A0A8B7RND4</b> | PLOD3      | Hipposideros armiger (Great Himalayan leaf-nosed bat)          |
| 41  | <b>A0A7M4F7B3</b> | PLOD1      | Crocodylus porosus (Saltwater crocodile) (Estuarine crocodile) |
| 42  | <b>A0A8C0X5Z8</b> | PLOD3      | Castor canadensis (American beaver)                            |

\* Entries in bold are used for the sequence alignment in Figure 4C of the paper. The result of the alignments for all the entries is provided in Figure Table S6.

**Table S6.** Sequence alignment of fifteen members of the LH family (forty-two LH enzymes in total) from the corresponded PLOD genes. Key: “\*” indicates residues conserved in all the sequences, while “.” and “.” indicate highly and weakly conserved residues. The complete list of the LH2 proteins from various genes (PLOD1, PLOD2, and PLOD3) of the studied organisms and the sequence alignment are provided in Table 5 and Figure 10.

T-COFFEE, Version\_11.00 (Version\_11.00)  
 Cedric Notredame  
 SCORE=95

\*  
 BAD AVG GOOD

|            |   |    |     |                                                                                             |     |
|------------|---|----|-----|---------------------------------------------------------------------------------------------|-----|
| O00469     | : | 92 | 538 | VDWKEKYINRDYSKIFT-ENIVEQPCPDVWFPIFSEKACDELVEEMEYHGKWSGGKHHDSRISGGYENVPVTDIHMKQVGLDLENVWLHFI | 626 |
| O60568     | : | 94 | 538 | VDWKEQYIHENYSRALEGEGLVEQPCPDVWFVFLLEQMCDELVEEMEYHGQWSGGRHEDSRLAGGYENVPVTDIHMKQVGYEDQWLQLL   | 627 |
| Q02809     | : | 96 | 528 | EDWKEQYIHENYSRALEGEGLVEQPCPDVWFVFLLEQMCDELVEEMEYHGQWSGGRHEDSRLAGGYENVPVTDIHMNQIGFEREWHKFL   | 616 |
| Q9R0E1     | : | 94 | 541 | VDWREQYIHENYSRALDGEGLVEQPCPDVWFVFLLEQMCDELVEEMEYHGQWSGGRHEDSRLAGGYENVPVTDIHMKQVGYEDQWLQLL   | 630 |
| Q9R0E2     | : | 96 | 529 | EDWKEQYIHENYSRALDGEGLVEQPCPDVWFVFLLEQMCDELVEEMEYHGQWSGGRHEDSRLAGGYENVPVTDIHMNQIGFEREWHKFL   | 617 |
| Q9R0B9     | : | 96 | 538 | VDWKEKYINRDYSKIFT-ENIVEQPCPDVWFPIFSEKACDELVEEMEYHGKWSGGKHHDSRISGGYENVPVTDIHMKQIGLENVWLHFI   | 626 |
| O77588     | : | 96 | 527 | EDWKEQYIHENYSRALDGEGLVEQPCPDVWFVFLLEQMCDELVEEMEYHGQWSGGRHEDSRLAGGYENVPVTDIHMNQIGFEREWHKFL   | 615 |
| Q5U367     | : | 94 | 541 | VDWREQYIHENYSRALDGEGLVEQPCPDVWFVFLLEQMCDELVEEMEYHGQWSGGRHEDSRLAGGYENVPVTDIHMKQVGYEDQWLQLL   | 630 |
| Q63321     | : | 96 | 529 | QDWKEQYIHENYSRALDGEGLVEQPCPDVWFVFLLEQMCDELVEEMEYHGQWSGGRHEDSRLAGGYENVPVTDIHMNQIGFEREWHKFL   | 617 |
| Q811A3     | : | 96 | 538 | VDWKEKYINRDYSKIFT-ENIVEQPCPDVWFPIFSEKACDELVEEMEYHGKWSGGKHHDSRISGGYENVPVTDIHMKQIGLENVWLHFI   | 626 |
| A0A8C6CWN0 | : | 96 | 540 | VDWKEKYINRDYSKIFT-ENIVEQPCPDVWFPIFSEKACDELVEEMEYHGQWSGGKHHDSRISGGYENVPVTDIHMKQIGLENVWLHFI   | 628 |
| A0A8C6D658 | : | 96 | 561 | VDWKEKYINRDYSKIFT-ENIVEQPCPDVWFPIFSEKACDELVEEMEYHGQWSGGKHHDSRISGGYENVPVTDIHMKQIGLENVWLHFI   | 649 |
| A0A8C6D4L0 | : | 94 | 551 | LDWKEQYIHENYSRALEGEGLVEQPCPDVWFVFLLEQMCDELVEEMEYHGQWSGGRHEDSRLAGGYENVPVTDIHMKQVGYEDQWLQLL   | 640 |
| A0A8B7RND4 | : | 94 | 540 | LDWKEQYIHENYSRALEGEGLVEQPCPDVWFVFLLEQMCDELVEEMEYHGQWSGGRHEDSRLAGGYENVPVTDIHMKQVGYEDQWLQLL   | 629 |
| A0A8C9KGF3 | : | 96 | 559 | VDWKEKYINRDYSKIFT-ENIVEQPCPDVWFPIFSEKACDELVEEMEYHGQWSGGKHHDSRISGGYENVPVTDIHMKQIGLENVWLHFI   | 647 |
| A0A8C9KH69 | : | 97 | 504 | VDWKEKYINRDYSKIFT-ENIVEQPCPDVWFPIFSEKACDELVEEMEYHGQWSGGKHHDSRISGGYENVPVTDIHMKQIGLENVWLHFI   | 592 |
| A0A8C9KQ19 | : | 96 | 538 | VDWKEKYINRDYSKIFT-ENIVEQPCPDVWFPIFSEKACDELVEEMEYHGQWSGGKHHDSRISGGYENVPVTDIHMKQIGLENVWLHFI   | 626 |
| A0A8C8XUH6 | : | 96 | 541 | VDWKEKYINRDYSKIFT-ENIVEQPCPDVWFPIFSEKACDELVEEMEYHGQWSGGKHHDSRISGGYENVPVTDIHMKQIGLENVWLHFI   | 629 |
| A0A8C8XVR4 | : | 96 | 562 | VDWKEKYINRDYSKIFT-ENIVEQPCPDVWFPIFSEKACDELVEEMEYHGQWSGGKHHDSRISGGYENVPVTDIHMKQIGLENVWLHFI   | 650 |
| A0A7M4F7B3 | : | 96 | 510 | EDWEEKYIHENYTAALGK-LVEMPCPDVWFPIFSEKACDELVEEMEYHGQWSAGGNVDNRIQGGYENVPVTDIHMNQIRFEREWHKFL    | 598 |
| A0A8D1JHC2 | : | 97 | 506 | VDWKEKYINRDYSKIFT-ENIVEQPCPDVWFPIFSEKACDELVEEMEYHGQWSGGKHHDSRISGGYENVPVTDIHMKQIGLENVWLHFI   | 594 |
| A0A8D0JHE2 | : | 97 | 506 | VDWKEKYINRDYSKIFT-ENIVEQPCPDVWFPIFSEKACDELVEEMEYHGQWSGGKHHDSRISGGYENVPVTDIHMKQIGLENVWLHFI   | 594 |
| A0A8D0ZY95 | : | 96 | 561 | VDWKEKYINRDYSKIFT-ENIVEQPCPDVWFPIFSEKACDELVEEMEYHGQWSGGKHHDSRISGGYENVPVTDIHMKQIGLENVWLHFI   | 649 |
| A0A8D0VHD4 | : | 97 | 527 | VDWKEKYINRDYSKIFT-ENIVEQPCPDVWFPIFSEKACDELVEEMEYHGQWSGGKHHDSRISGGYENVPVTDIHMKQIGLENVWLHFI   | 615 |
| A0A8D1P4F3 | : | 94 | 539 | LDWKEQYIHENYSRALEGEGLVEQPCPDVWFVFLLEQMCDELVEEMEYHGQWSGGRHEDSRLAGGYENVPVTDIHMKQVGYEDQWLQLL   | 628 |
| A0A8D1KIW7 | : | 97 | 507 | VDWKEKYINRDYSKIFT-ENIVEQPCPDVWFPIFSEKACDELVEEMEYHGQWSGGKHHDSRISGGYENVPVTDIHMKQIGLENVWLHFI   | 595 |
| A0A8D0K2Z4 | : | 93 | 497 | LDWKEQYIHENYSRALEGEGLVEQPCPDVWFVFLLEQMCDELVEEMEYHGQWSGGRHEDSRLAGGYENVPVTDIHMKQVGYEDQWLQLL   | 586 |
| A0A8D1K1H1 | : | 93 | 545 | LDWKEQYIHENYSRALEGEGLVEQPCPDVWFVFLLEQMCDELVEEMEYHGQWSGGRHEDSRLAGGYENVPVTDIHMKQVGYEDQWLQLL   | 634 |
| A0A8D0VHY0 | : | 96 | 540 | VDWKEKYINRDYSKIFT-ENIVEQPCPDVWFPIFSEKACDELVEEMEYHGQWSGGKHHDSRISGGYENVPVTDIHMKQIGLENVWLHFI   | 628 |
| A0A8B8YU86 | : | 96 | 546 | EDWKEKYIHENYSRALDGEGLVEQPCPDVWFVFLLEQMCDELVEEMEYHGQWSGGKHHDSRISGGYENVPVTDIHMNQIGFEREWHKFL   | 634 |
| A0A8B8YLE1 | : | 96 | 528 | EDWKEKYIHENYSRALDGEGLVEQPCPDVWFVFLLEQMCDELVEEMEYHGQWSGGKHHDSRISGGYENVPVTDIHMNQIGFEREWHKFL   | 616 |
| A0A8C0CFQ9 | : | 96 | 560 | VDWKEKYINRDYSKIFT-ENIVEQPCPDVWFPIFSEKACDELVEEMEYHGQWSGGKHHDSRISGGYENVPVTDIHMKQIGLENVWLHFI   | 648 |
| A0A8B8VB21 | : | 93 | 539 | LDWKEQYIHENYSRALEGEGLVEQPCPDVWFVFLLEQMCDELVEEMEYHGQWSGGRHEDSRLAGGYENVPVTDIHMKQVGYEDQWLQLL   | 628 |
| A0A8C0CCB7 | : | 96 | 539 | VDWKEKYINRDYSKIFT-ENIVEQPCPDVWFPIFSEKACDELVEEMEYHGQWSGGKHHDSRISGGYENVPVTDIHMKQIGLENVWLHFI   | 627 |
| A0A8B9FJM7 | : | 95 | 531 | EDWREKYIHENYTAALGK-LVEMPCPDVWFPIFSEKACDELVEEMEYHGQWSGGKHHDSRISGGYENVPVTDIHMNQIGFEREWHKFL    | 619 |
| A0A8B9CT93 | : | 96 | 527 | EDWREKYIHENYTAALGK-LVEMPCPDVWFPIFSEKACDELVEEMEYHGQWSGGKHHDSRISGGYENVPVTDIHMNQIGFEREWHKFL    | 615 |
| A0A8B9BIE8 | : | 93 | 538 | VDWKEQYIHENYSRALDGEGLVEQPCPDVWFVFLLEQMCDELVEEMEYHGQWSGGKHHDSRISGGYENVPVTDIHMKQIGLENVWLHFI   | 626 |
| A0A8B9CR79 | : | 96 | 522 | EDWREKYIHENYTAALGK-LVEMPCPDVWFPIFSEKACDELVEEMEYHGQWSGGKHHDSRISGGYENVPVTDIHMNQIGFEREWHKFL    | 610 |
| A0A8B8TKG6 | : | 96 | 347 | VDWKEKYINRDYSKIFT-ENIVEQPCPDVWFPIFSEKACDELVEEMEYHGQWSGGKHHDSRISGGYENVPVTDIHMKQIGLENVWLHFI   | 435 |
| A0A8B8TKG9 | : | 95 | 326 | VDWKEKYINRDYSKIFT-ENIVEQPCPDVWFPIFSEKACDELVEEMEYHGQWSGGKHHDSRISGGYENVPVTDIHMKQIGLENVWLHFI   | 414 |
| A0A8B7KEY5 | : | 96 | 528 | EDWKEKYIHENYSRALDGEGLVEQPCPDVWFVFLLEQMCDELVEEMEYHGQWSGGKHHDSRISGGYENVPVTDIHMNQIGFEREWHKFL   | 616 |
| A0A8C0X5Z8 | : | 94 | 539 | VDWKEQYIHENYSRALDGEGLVEQPCPDVWFVFLLEQMCDELVEEMEYHGQWSGGKHHDSRISGGYENVPVTDIHMKQVGYEDQWLQLL   | 628 |
| P24802     | : | 96 | 531 | EDWREKYIHENYTAALGK-LVEMPCPDVWFPIFSEKACDELVEEMEYHGQWSGGKHHDSRISGGYENVPVTDIHMNQIGFEREWHKFL    | 619 |
| cons       | : | 9  | 631 | *** ** :!*: : . : ** *****:***: : : ***** ** :*** * : * . : ***** ** : * : : *              | 720 |



|             |     |                                                                                            |     |
|-------------|-----|--------------------------------------------------------------------------------------------|-----|
| O00469      | 627 | REFIAPVTLKVFAGYYTKGFALLNFVVKYSPERQSLRPHHDASTFTINIALNNVGEDFQGGGCKFLRYNCIESPRKGSFMPGRLTH     | 716 |
| O60568      | 628 | RTYVGPMTESLFPGYHTKTRAVMNFVVRYPDEQPSLRPHHDASTFTINIALNNVGEDFQGGGCKFLRYDCVSSPRKGWALLHPGRLTH   | 717 |
| Q02809      | 617 | LEYIAPMTEKLYPGYYTRAQFDLAFVVRYPDEQPSLRPHHDASTFTINIALNRVGDYEGGGCRFLRYNCISIRAPRKGWTLMPGRLTH   | 706 |
| Q9R0E1      | 631 | RTYVGPMTTEYLFPGYHTKTRAVMNFVVRYPDEQPSLRPHHDASTFTINIALNNVGEDFQGGGCKFLRYDCRISSPRKGWALLHPGRLTH | 720 |
| Q9R0E2      | 618 | VEYIAPMTEKLYPGYYTRAQFDLAFVVRYPDEQPSLRPHHDASTFTINIALNRVGDYEGGGCRFLRYNCISIRAPRKGWALLHPGRLTH  | 707 |
| Q9R0B9      | 627 | REFIAPVTLKVFAGYYTKGFALLNFVVKYSPERQSLRPHHDASTFTINIALNNVGEDFQGGGCKFLRYNCIESPRKGSFMPGRLTH     | 716 |
| O77588      | 616 | VEYIAPMTEKLYPGYYTRAQFDLAFVVRYPDEQPSLRPHHDASTFTINIALNRVGDYEGGGCRFLRYNCISIRAPRKGWTLMPGRLTH   | 705 |
| Q5U367      | 631 | RTYVGPMTTEYLFPGYHTKTRAVMNFVVRYPDEQPSLRPHHDASTFTINIALNNVGEDFQGGGCKFLRYDCRISSPRKGWALLHPGRLTH | 720 |
| Q63321      | 618 | VEYIAPMTEKLYPGYYTRAQFDLAFVVRYPDEQPSLRPHHDASTFTINIALNRVGDYEGGGCRFLRYNCISIRAPRKGWALLHPGRLTH  | 707 |
| Q811A3      | 627 | REFIAPVTLKVFAGYYTKGFALLNFVVKYSPERQSLRPHHDASTFTINIALNNVGEDFQGGGCKFLRYNCIESPRKGSFMPGRLTH     | 716 |
| AOA8C6CWN0  | 627 | REFIAPVTLKVFAGYYTKGFALLNFVVKYSPERQSLRPHHDASTFTINIALNNVGEDFQGGGCKFLRYNCIESPRKGSFMPGRLTH     | 718 |
| AOA8C6D658  | 650 | REFIAPVTLKVFAGYYTKGFALLNFVVKYSPERQSLRPHHDASTFTINIALNNVGEDFQGGGCKFLRYNCIESPRKGSFMPGRLTH     | 739 |
| AOA8C6D4L0  | 641 | RAYVGPMTESLFPGYHTKTRAVMNFVVRYPDEQPSLRPHHDASTFTINIALNNVGEDFQGGGCKFLRYDCVSSPRKGWALLHPGRLTH   | 730 |
| AOA8B7RND4  | 630 | RTYVGPMTESLFPGYHTKTRAVMNFVVRYPDEQPSLRPHHDASTFTINIALNRVGDYEGGGCRFLRYDCVSSPRKGWALLHPGRLTH    | 719 |
| AOA8C9KGF3  | 648 | REFIAPVTLKVFAGYYTKGFALLNFVVKYSPERQSLRPHHDASTFTINIALNNVGEDFQGGGCKFLRYNCIESPRKGSFMPGRLTH     | 737 |
| AOA8C9KH69  | 593 | REFIAPVTLKVFAGYYTKGFALLNFVVKYSPERQSLRPHHDASTFTINIALNNVGEDFQGGGCKFLRYNCIESPRKGSFMPGRLTH     | 682 |
| AOA8C9KQ19  | 627 | REFIAPVTLKVFAGYYTKGFALLNFVVKYSPERQSLRPHHDASTFTINIALNNVGEDFQGGGCKFLRYNCIESPRKGSFMPGRLTH     | 716 |
| AOA8C8XUH6  | 630 | REFIAPVTLKVFAGYYTKGFALLNFVVKYSPERQSLRPHHDASTFTINIALNNVGEDFQGGGCKFLRYNCIESPRKGSFMPGRLTH     | 719 |
| AOA8C8XVR4  | 651 | REFIAPVTLKVFAGYYTKGFALLNFVVKYSPERQSLRPHHDASTFTINIALNNVGEDFQGGGCKFLRYNCIESPRKGSFMPGRLTH     | 740 |
| AOA7M4F7B3  | 599 | LEYIAPITEKLYPGYYTKQFELAFVVRYPDEQPSLRPHHDASTFTINIALNRVGDYEGGGCRFLRYNCISIRAPRKGWTLMPGRLTH    | 688 |
| AOA8D1JHC2  | 595 | REFIAPVTLKVFAGYYTKGFALLNFVVKYSPERQSLRPHHDASTFTINIALNNVGEDFQGGGCKFLRYNCIESPRKGSFMPGRLTH     | 684 |
| AOA8D0JHE2  | 595 | REFIAPVTLKVFAGYYTKGFALLNFVVKYSPERQSLRPHHDASTFTINIALNNVGEDFQGGGCKFLRYNCIESPRKGSFMPGRLTH     | 684 |
| AOA8D0ZY95  | 650 | REFIAPVTLKVFAGYYTKGFALLNFVVKYSPERQSLRPHHDASTFTINIALNNVGEDFQGGGCKFLRYNCIESPRKGSFMPGRLTH     | 739 |
| AOA8D0VHD4  | 616 | REFIAPVTLKVFAGYYTKGFALLNFVVKYSPERQSLRPHHDASTFTINIALNNVGEDFQGGGCKFLRYNCIESPRKGSFMPGRLTH     | 705 |
| AOA8D1P4F3  | 629 | RTYVGPMTESLFPGYHTKTRAVMNFVVRYPDEQPSLRPHHDASTFTINIALNRVGDYEGGGCRFLRYDCVSSPRKGWALLHPGRLTH    | 718 |
| AOA8D1KIW7  | 596 | REFIAPVTLKVFAGYYTKGFALLNFVVKYSPERQSLRPHHDASTFTINIALNNVGEDFQGGGCKFLRYNCIESPRKGSFMPGRLTH     | 685 |
| AOA8D0K2Z4  | 587 | RTYVGPMTESLFPGYHTKTRAVMNFVVRYPDEQPSLRPHHDASTFTINIALNRVGDYEGGGCRFLRYDCVSSPRKGWALLHPGRLTH    | 676 |
| AOA8D1KI1H1 | 635 | RTYVGPMTESLFPGYHTKTRAVMNFVVRYPDEQPSLRPHHDASTFTINIALNRVGDYEGGGCRFLRYDCVSSPRKGWALLHPGRLTH    | 724 |
| AOA8D0VHY0  | 629 | REFIAPVTLKVFAGYYTKGFALLNFVVKYSPERQSLRPHHDASTFTINIALNNVGEDFQGGGCKFLRYNCIESPRKGSFMPGRLTH     | 718 |
| AOA8B8YU86  | 635 | VEYIAPMTEKLYPGYYTRAQFDLAFVVRYPDEQPSLRPHHDASTFTINIALNRVGDYEGGGCRFLRYNCISIRAPRKGWTLMPGRLTH   | 724 |
| AOA8B8YLE1  | 617 | VEYIAPMTEKLYPGYYTRAQFDLAFVVRYPDEQPSLRPHHDASTFTINIALNRVGDYEGGGCRFLRYNCISIRAPRKGWTLMPGRLTH   | 706 |
| AOA8C0CFQ9  | 649 | REFIAPVTLKVFAGYYTKGFALLNFVVKYSPERQSLRPHHDASTFTINIALNNVGEDFQGGGCKFLRYNCIESPRKGSFMPGRLTH     | 738 |
| AOA8B8VB21  | 629 | RTYVGPMTESLFPGYHTKTRAVMNFVVRYPDEQPSLRPHHDASTFTINIALNRVGDYEGGGCRFLRYDCVSSPRKGWALLHPGRLTH    | 718 |
| AOA8C0CCB7  | 628 | REFIAPVTLKVFAGYYTKGFALLNFVVKYSPERQSLRPHHDASTFTINIALNNVGEDFQGGGCKFLRYNCIESPRKGSFMPGRLTH     | 717 |
| AOA8B9FJM7  | 620 | LEYIAPITEKLYPGYYTKQFELAFVVRYPDEQPSLRPHHDASTFTINIALNRVGDYEGGGCRFLRYNCISIRAPRKGWTLMPGRLTH    | 709 |
| AOA8B9CT93  | 616 | LDYIAPITEKLYPGYYTKQFELAFVVRYPDEQPSLRPHHDASTFTINIALNRVGDYEGGGCRFLRYNCISIRAPRKGWTLMPGRLTH    | 705 |
| AOA8B9BIE8  | 627 | REFIAPVTLKVFAGYYTKGYALLNFVVKYSPERQSLRPHHDASTFTINIALNRVGDYEGGGCKFLRYNCIESPRKGSFMPGRLTH      | 716 |
| AOA8B9CR79  | 611 | LDYIAPITEKLYPGYYTKQFELAFVVRYPDEQPSLRPHHDASTFTINIALNRVGDYEGGGCRFLRYNCISIRAPRKGWTLMPGRLTH    | 700 |
| AOA8B8TKG6  | 436 | REFIAPVTLKVFAGYYTKGFALLNFVVKYSPERQSLRPHHDASTFTINIALNNVGEDFQGGGCKFLRYNCIESPRKGSFMPGRLTH     | 525 |
| AOA8B8TKG9  | 415 | REFIAPVTLKVFAGYYTKGFALLNFVVKYSPERQSLRPHHDASTFTINIALNNVGEDFQGGGCKFLRYNCIESPRKGSFMPGRLTH     | 504 |
| AOA8B7KEY5  | 617 | VEYIAPMTEKLYPGYYTRAQFDLAFVVRYPDEQPSLRPHHDASTFTINIALNRVGDYEGGGCRFLRYNCISIRAPRKGWTLMPGRLTH   | 706 |
| AOA8C0X5Z8  | 629 | RTYVGPMTESLFPGYHTKTRAVMNFVVRYPDEQPSLRPHHDASTFTINIALNRVGDYEGGGCRFLRYDCVSSPRKGWALLHPGRLTH    | 718 |
| P24802      | 620 | LDYIAPITEKLYPGYYTKQFELAFVVRYPDEQPSLRPHHDASTFTINIALNRVGDYEGGGCRFLRYNCISIRAPRKGWTLMPGRLTH    | 709 |
| cons        | 721 | ::.*:* :.**:*: : **:* *.:* ** ***:**:*:*:*:* *.:**:*:**:*:* : :***** :*****                | 810 |

|             |     |                       |     |
|-------------|-----|-----------------------|-----|
| O00469      | 717 | LHEGLPVKNGTRYIAVSEIDP | 737 |
| O60568      | 718 | YHEGLPTTWGTRYIMVSEVDP | 738 |
| Q02809      | 707 | YHEGLPTRGTRYIAVSEVDP  | 727 |
| Q9R0E1      | 721 | YHEGLPTRGTRYIMVSEVDP  | 741 |
| Q9R0E2      | 708 | YHEGLPTTKGTRYIAVSEVDP | 728 |
| Q9R0B9      | 717 | LHEGLPVKNGTRYIAVSEIDP | 737 |
| O77588      | 706 | YHEGLPTTKGTRYIAVSEVDP | 726 |
| Q5U367      | 721 | YHEGLPTRGTRYIMVSEVDP  | 741 |
| Q63321      | 708 | YHEGLPTTKGTRYIAVSEVDP | 728 |
| Q811A3      | 717 | LHEGLPVKNGTRYIAVSEIDP | 737 |
| AOA8C6CWN0  | 719 | LHEGLPVKNGTRYIAVSEIDP | 739 |
| AOA8C6D658  | 740 | LHEGLPVKNGTRYIAVSEIDP | 760 |
| AOA8C6D4L0  | 731 | YHEGLPTRGTRYIMVSEVDP  | 751 |
| AOA8B7RND4  | 720 | YHEGLPTRGTRYIMVSEVDP  | 740 |
| AOA8C9KGF3  | 738 | LHEGLPVKNGTRYIAVSEIDP | 758 |
| AOA8C9KH69  | 683 | LHEGLPVKNGTRYIAVSEIDP | 703 |
| AOA8C9KQ19  | 717 | LHEGLPVKNGTRYIAVSEIDP | 737 |
| AOA8C8XUH6  | 720 | LHEGLPVKNGTRYIAVSEIDP | 740 |
| AOA8C8XVR4  | 741 | LHEGLPVKNGTRYIAVSEIDP | 761 |
| AOA7M4F7B3  | 689 | YHEGLPTTKGTRYIAVSEIDP | 709 |
| AOA8D1JHC2  | 685 | LHEGLPVKNGTRYIAVSEIDP | 705 |
| AOA8D0JHE2  | 685 | LHEGLPVKNGTRYIAVSEIDP | 705 |
| AOA8D0ZY95  | 740 | LHEGLPVKNGTRYIAVSEIDP | 760 |
| AOA8D0VHD4  | 706 | LHEGLPVKNGTRYIAVSEIDP | 726 |
| AOA8D1P4F3  | 719 | YHEGLPTRGTRYIMVSEVDP  | 739 |
| AOA8D1KIW7  | 686 | LHEGLPVKNGTRYIAVSEIDP | 706 |
| AOA8D0K2Z4  | 677 | YHEGLPTRGTRYIMVSEVDP  | 697 |
| AOA8D1KI1H1 | 725 | YHEGLPTRGTRYIMVSEVDP  | 745 |
| AOA8D0VHY0  | 719 | LHEGLPVKNGTRYIAVSEIDP | 739 |
| AOA8B8YU86  | 725 | YHEGLPTTKGTRYIAVSEVDP | 745 |
| AOA8B8YLE1  | 707 | YHEGLPTTKGTRYIAVSEVDP | 727 |
| AOA8C0CFQ9  | 739 | LHEGLPVKNGTRYIAVSEIDP | 759 |
| AOA8B8VB21  | 719 | YHEGLPTRGTRYIMVSEVDP  | 739 |
| AOA8C0CCB7  | 718 | LHEGLPVKNGTRYIAVSEIDP | 738 |
| AOA8B9FJM7  | 710 | YHEGLPTTKGTRYIAVSEIDP | 730 |
| AOA8B9CT93  | 706 | YHEGLPTTKGTRYIAVSEIDP | 726 |
| AOA8B9BIE8  | 717 | LHEGLPILNGTRYIAVSEIDP | 737 |
| AOA8B9CR79  | 701 | YHEGLPTTKGTRYIAVSEIDP | 721 |
| AOA8B8TKG6  | 526 | LHEGLPVKNGTRYIAVSEIDP | 546 |
| AOA8B8TKG9  | 505 | LHEGLPVKNGTRYIAVSEIDP | 525 |
| AOA8B7KEY5  | 707 | YHEGLPTTKGTRYIAVSEVDP | 727 |
| AOA8C0X5Z8  | 719 | YHEGLPTRGTRYIMVSEVDP  | 739 |
| P24802      | 710 | YHEGLPTTKGTRYIAVSEIDP | 730 |
| cons        | 811 | ***** ***:** ***:**   | 831 |

**Table S7.** Statistics of the geometry in the active site around Fe ion during the 5ns MD simulation.

| ID | Compound | Fe–H666(N) <sup>1</sup> | Fe–D668(O) <sup>2</sup> | Fe–D668(O=C) <sup>1,2</sup> | Fe–H718(N) <sup>1</sup> |
|----|----------|-------------------------|-------------------------|-----------------------------|-------------------------|
| 37 | c28a     | 2.26±0.09               | 2.08±0.07               | 3.32±0.14                   | 2.30±0.13               |
| 38 | c28b     | 2.27±0.09               | 2.09±0.08               | 3.41±0.17                   | 2.27±0.09               |
| 39 | c28c     | 2.26±0.09               | 2.15±0.09               | 2.23±0.12                   | 2.27±0.12               |
| 40 | c28e     | 2.26±0.10               | 2.08±0.09               | 3.36±0.16                   | 2.25±0.09               |
| 41 | c28f     | 2.24±0.09               | 2.07±0.09               | 3.39±0.17                   | 2.24±0.08               |
| 42 | c2d      | 2.27±0.09               | 2.07±0.09               | 3.45±0.17                   | 2.27±0.09               |
| 43 | c24      | 2.26±0.09               | 2.08±0.10               | 3.73±0.23                   | 2.28±0.08               |
| 44 | c25      | 2.26±0.10               | 2.11±0.10               | 3.36±0.16                   | 2.25±0.10               |

<sup>1</sup> The distance (Å) between Fe and interacting atoms from the binding pocket. The specific atoms and their interactions can be found in Scheme 1B.

<sup>2</sup> O=C means the O of carbonyl from D668, which is illustrated in Scheme 1B-(III).

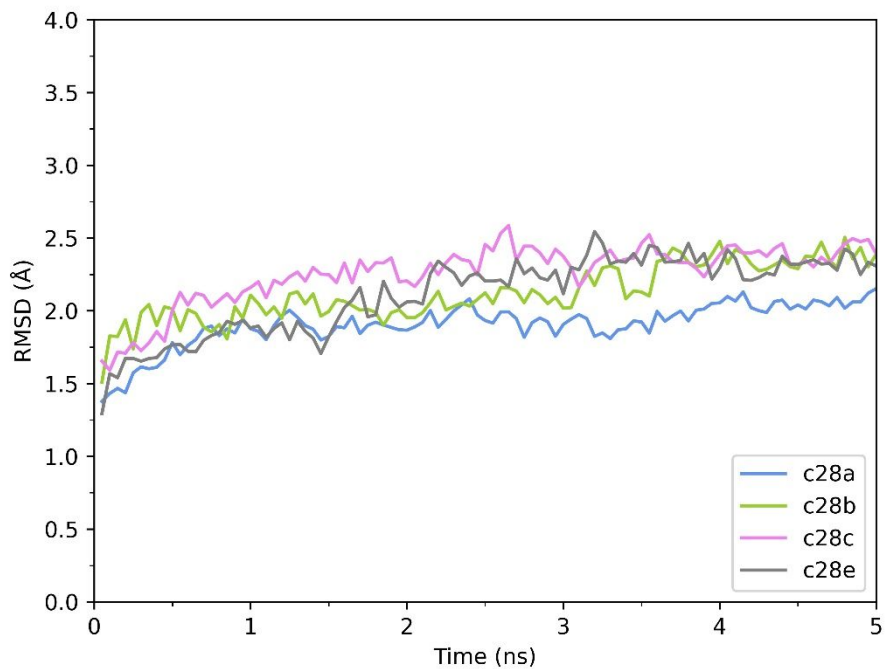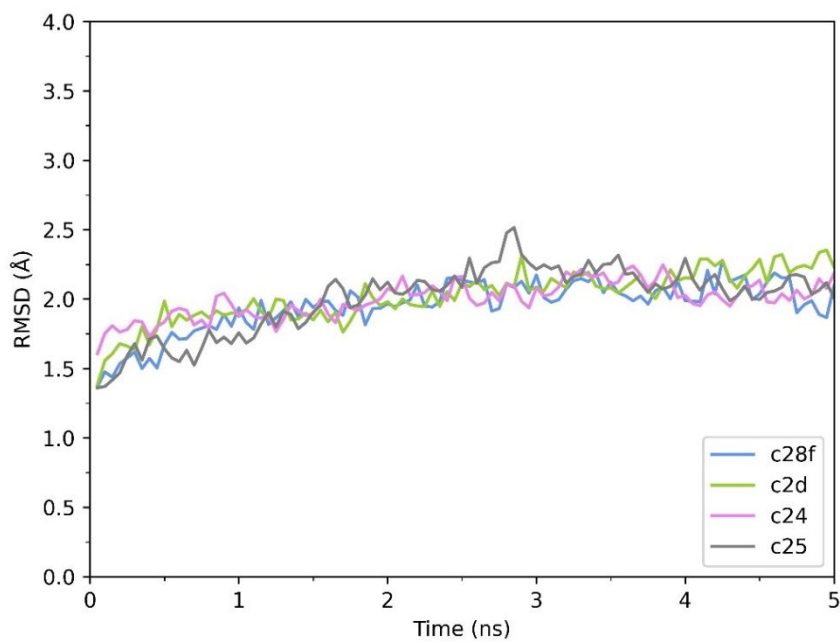

**Figure S6.** RMSD of F638~I734 component (core part with Fe ion) of LH2 bound to the third set of lead compounds during the MD simulation by AMOEBA force field

**Table S8.** The results of the *k*-means clustering analysis and relative QM/MM optimization energies (eV) for each representative of the third series of the lead compounds.

| Ligand      | Cluster No. | Representative No. | Representative abundance (%) | Relative opt. energy (eV) |
|-------------|-------------|--------------------|------------------------------|---------------------------|
| <b>c28a</b> | 1           | 9                  | 22                           | 176                       |
|             | 2           | 27                 | 2                            | 113                       |
|             | 3           | 28                 | 17                           | 0                         |
|             | 4           | 29                 | 18                           | 46                        |
|             | 5           | 55                 | 23                           | 116                       |
|             | 6           | 57                 | 18                           | 196                       |
| <b>c28b</b> | 1           | 14                 | 15                           | 241                       |
|             | 2           | 19                 | 25                           | 169                       |
|             | 3           | 54                 | 21                           | 0                         |
|             | 4           | 76                 | 15                           | 87                        |
|             | 5           | 95                 | 12                           | 52                        |
|             | 6           | 96                 | 12                           | 44                        |
| <b>c28c</b> | 1           | 12                 | 11                           | 28                        |
|             | 2           | 14                 | 20                           | 79                        |
|             | 3           | 73                 | 21                           | 129                       |
|             | 4           | 76                 | 20                           | 0                         |
|             | 5           | 85                 | 10                           | 29                        |
|             | 6           | 87                 | 18                           | 264                       |
| <b>c28e</b> | 1           | 2                  | 6                            | 233                       |
|             | 2           | 36                 | 15                           | 33                        |
|             | 3           | 57                 | 18                           | 240                       |
|             | 4           | 71                 | 18                           | 317                       |
|             | 5           | 72                 | 22                           | 316                       |
|             | 6           | 78                 | 21                           | 0                         |
| <b>c28f</b> | 1           | 9                  | 17                           | 0                         |
|             | 2           | 66                 | 15                           | 24                        |
|             | 3           | 68                 | 21                           | 11                        |
|             | 4           | 71                 | 20                           | 158                       |
|             | 5           | 73                 | 9                            | 41                        |
|             | 6           | 84                 | 18                           | 120                       |
| <b>c2d</b>  | 1           | 5                  | 29                           | 0                         |
|             | 2           | 28                 | 22                           | 84                        |
|             | 3           | 34                 | 16                           | 24                        |
|             | 4           | 43                 | 10                           | 42                        |
|             | 5           | 44                 | 13                           | 134                       |
|             | 6           | 81                 | 10                           | 117                       |
| <b>c24</b>  | 1           | 23                 | 20                           | 45                        |
|             | 2           | 25                 | 8                            | 22                        |
|             | 3           | 26                 | 24                           | 0                         |
|             | 4           | 29                 | 18                           | 99                        |
|             | 5           | 61                 | 10                           | 60                        |
|             | 6           | 81                 | 20                           | 104                       |
| <b>c25</b>  | 1           | 39                 | 16                           | 314                       |
|             | 2           | 51                 | 32                           | 0                         |
|             | 3           | 72                 | 10                           | 170                       |
|             | 4           | 80                 | 12                           | 69                        |
|             | 5           | 83                 | 15                           | 274                       |
|             | 6           | 86                 | 15                           | 101                       |

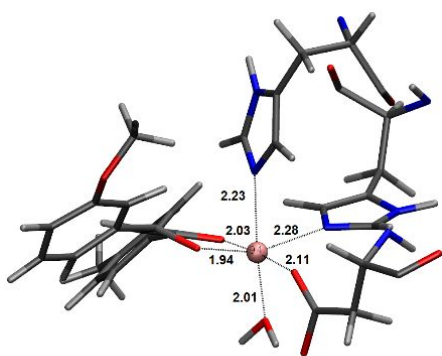

Frame 9

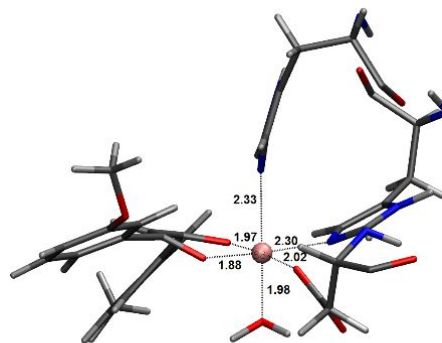

Frame 27

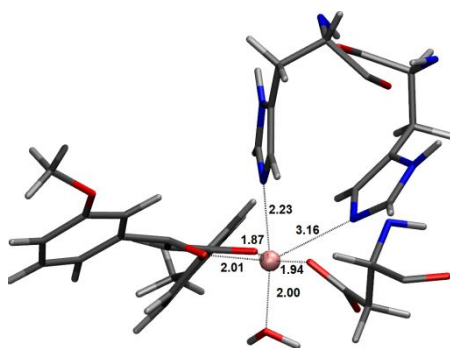

Frame 28

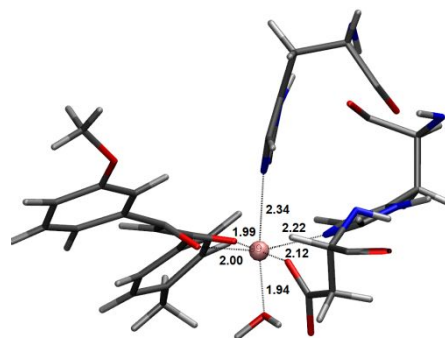

Frame 29

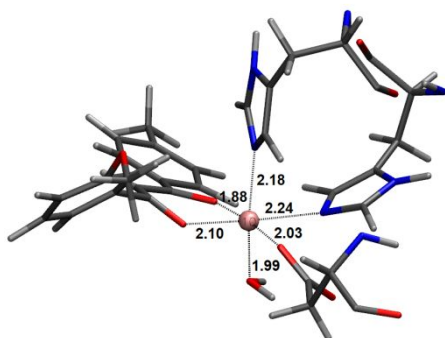

Frame 55

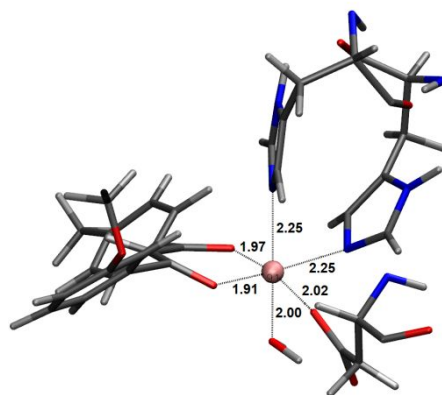

Frame 57

**Figure S7.** Close-up showing the distances between Fe(II) and residues of the active site in each representative structure of c28a. The distances between the iron and H666, D668, H718, ligand, and water molecule are given in each figure. The MM region is not shown for more clarity. Detailed results are given in Table S7.

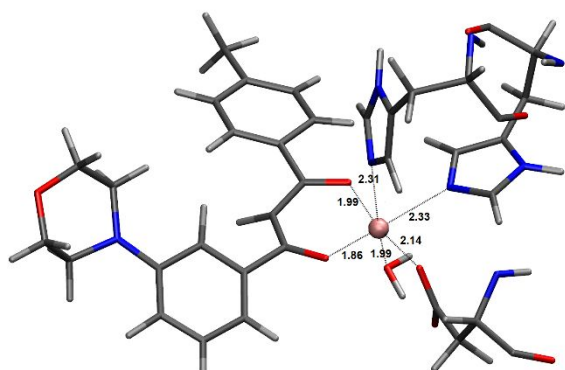

Frame 14

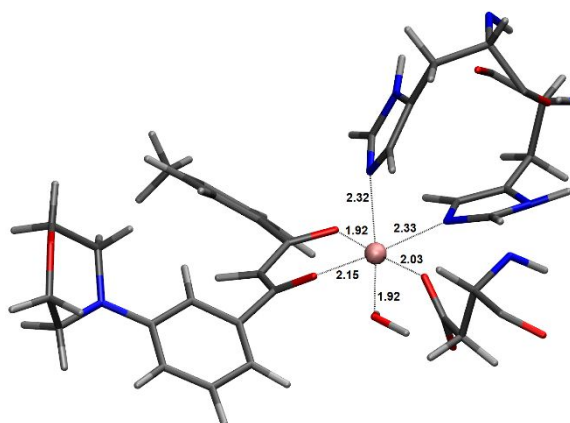

Frame 19

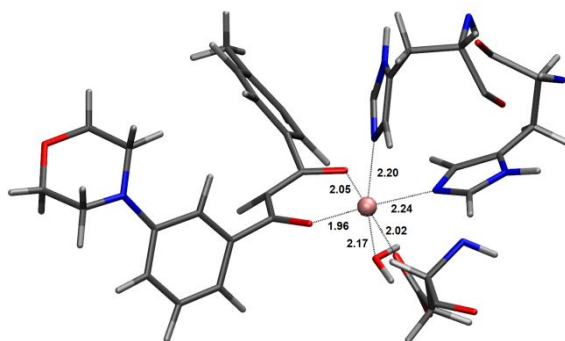

Frame 54

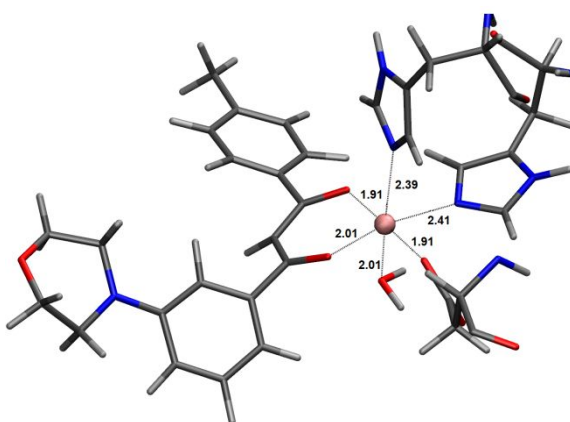

Frame 76

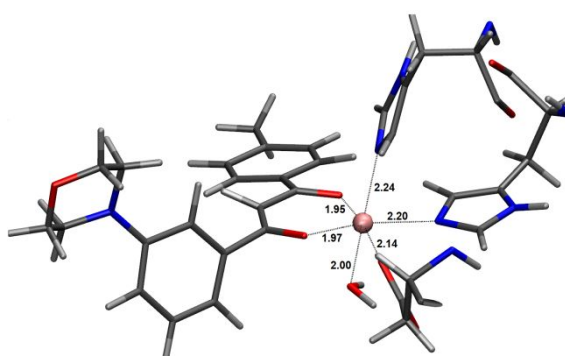

Frame 95

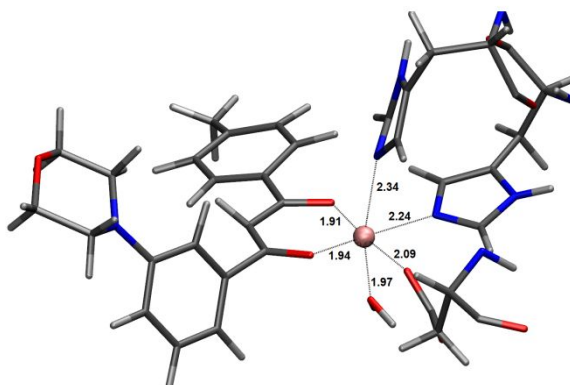

Frame 96

**Figure S8.** Close-up showing the distances between Fe(II) and residues of the active site in each representative structure of c28b. The distances between the iron and H666, D668, H718, ligand, and water molecule are given in each figure. The MM region is not shown for more clarity. Detailed results are given in Table S7.

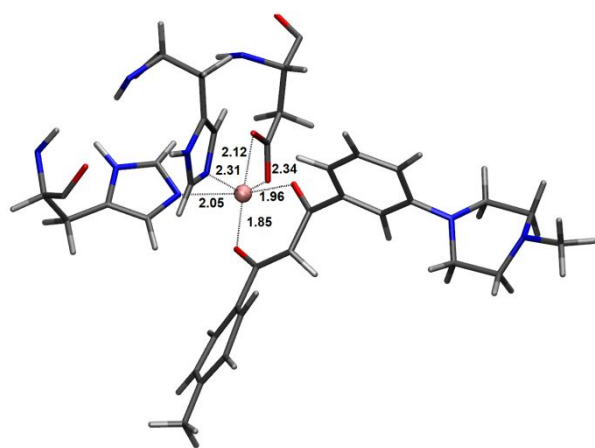

Frame 12

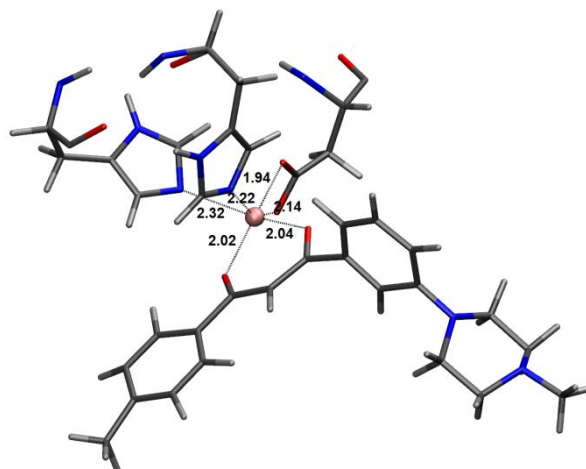

Frame 14

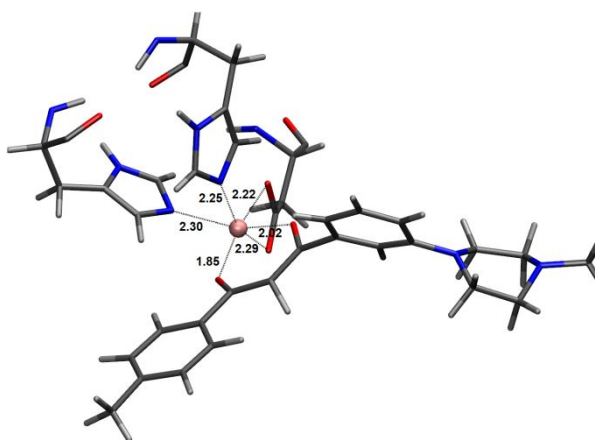

Frame 73

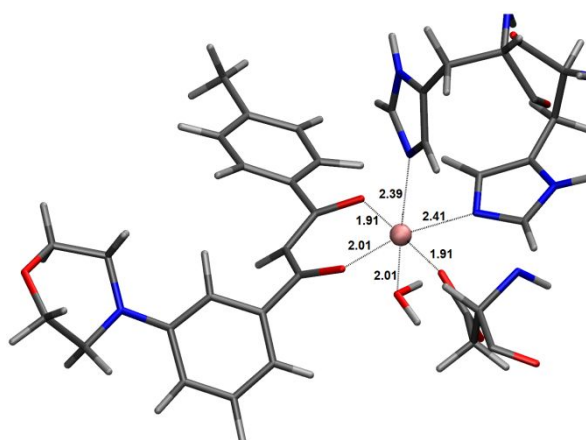

Frame 76

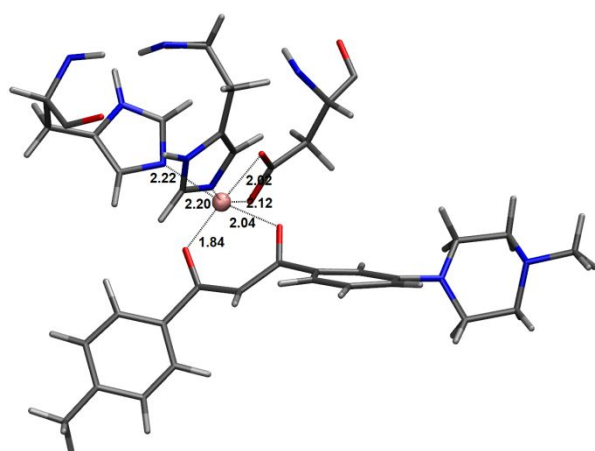

Frame 85

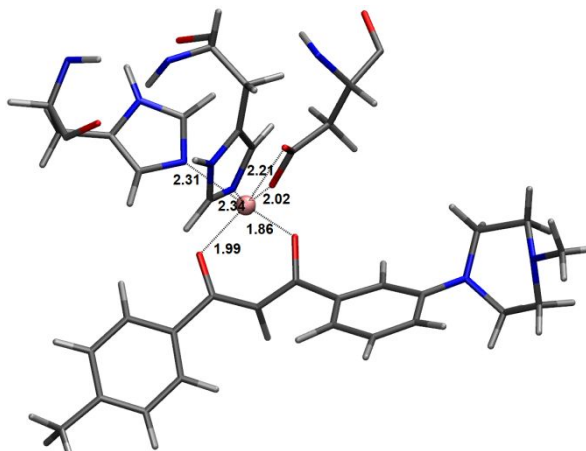

Frame 87

**Figure S9.** Close-up showing the distances between Fe(II) and residues of the active site in each representative structure of c28c. The distances between the iron and H666, D668, H718, ligand, and water molecule are given in each figure. The MM region is not shown for more clarity. Detailed results are given in Table S7.

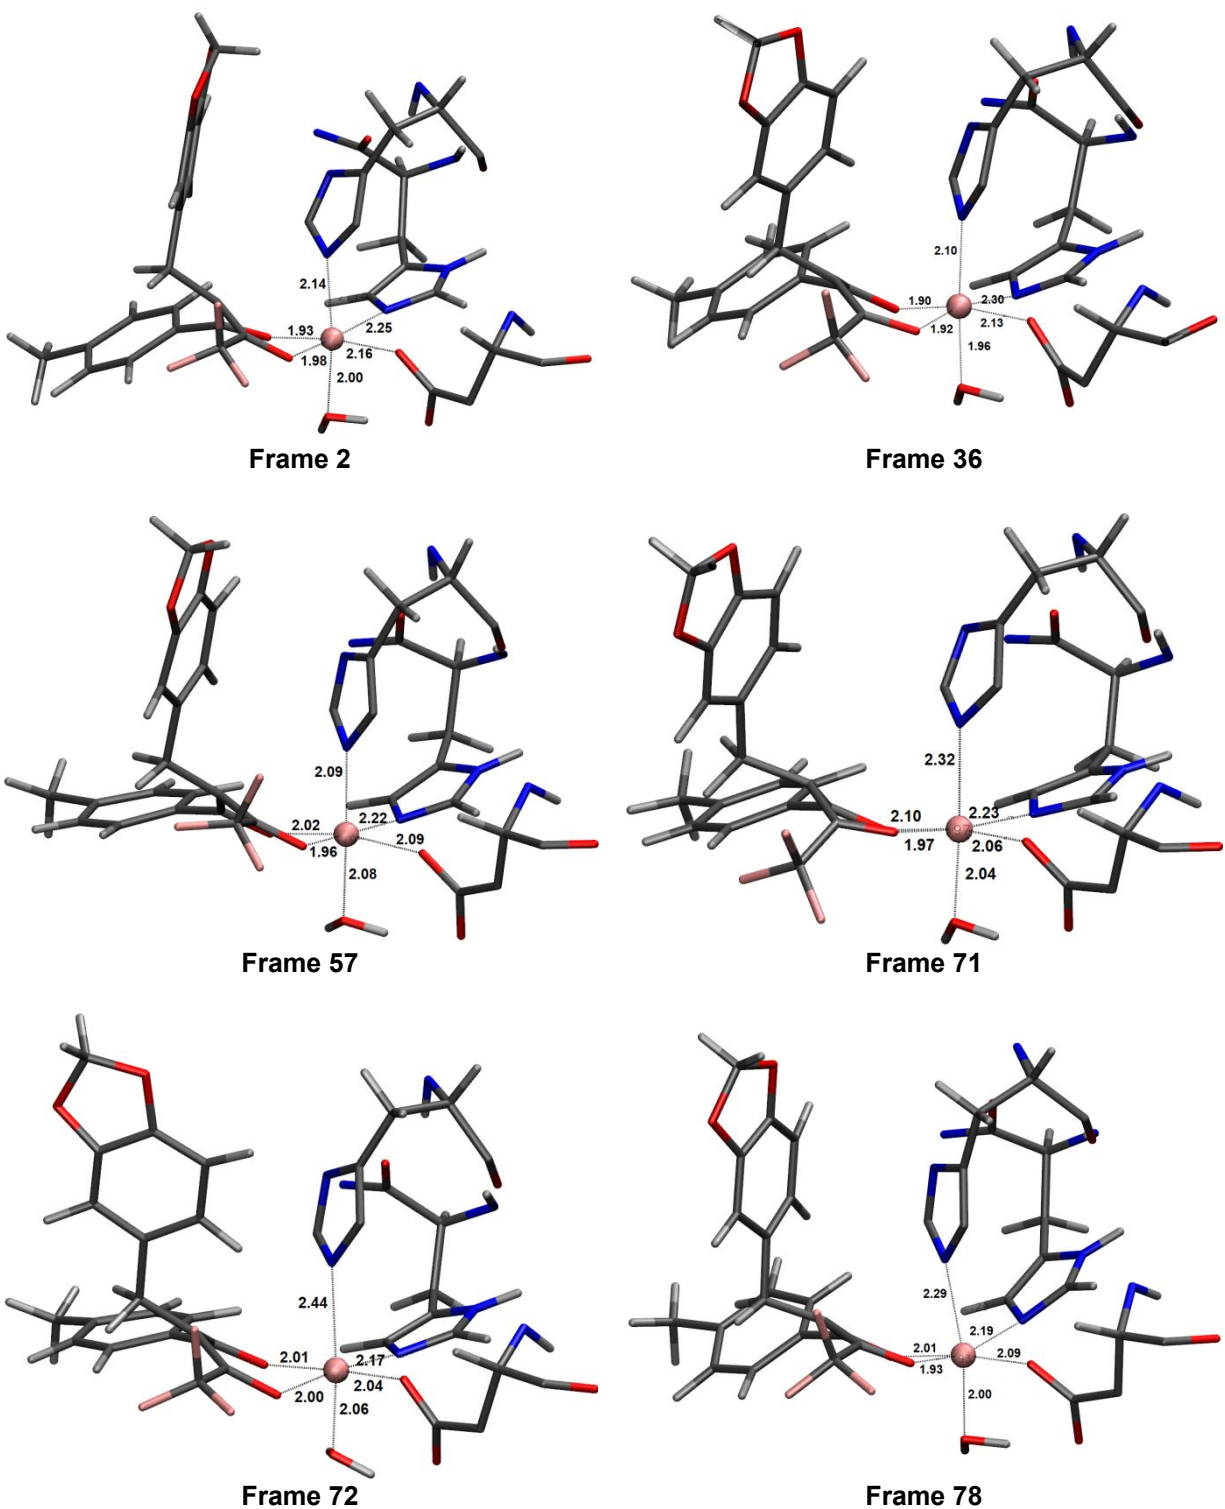

**Figure S10.** Close-up showing the distances between Fe(II) and residues of the active site in each representative structure of c28e. The distances between the iron and H666, D668, H718, ligand, and water molecule are given in each figure. The MM region is not shown for more clarity. Detailed results are given in Table S7.



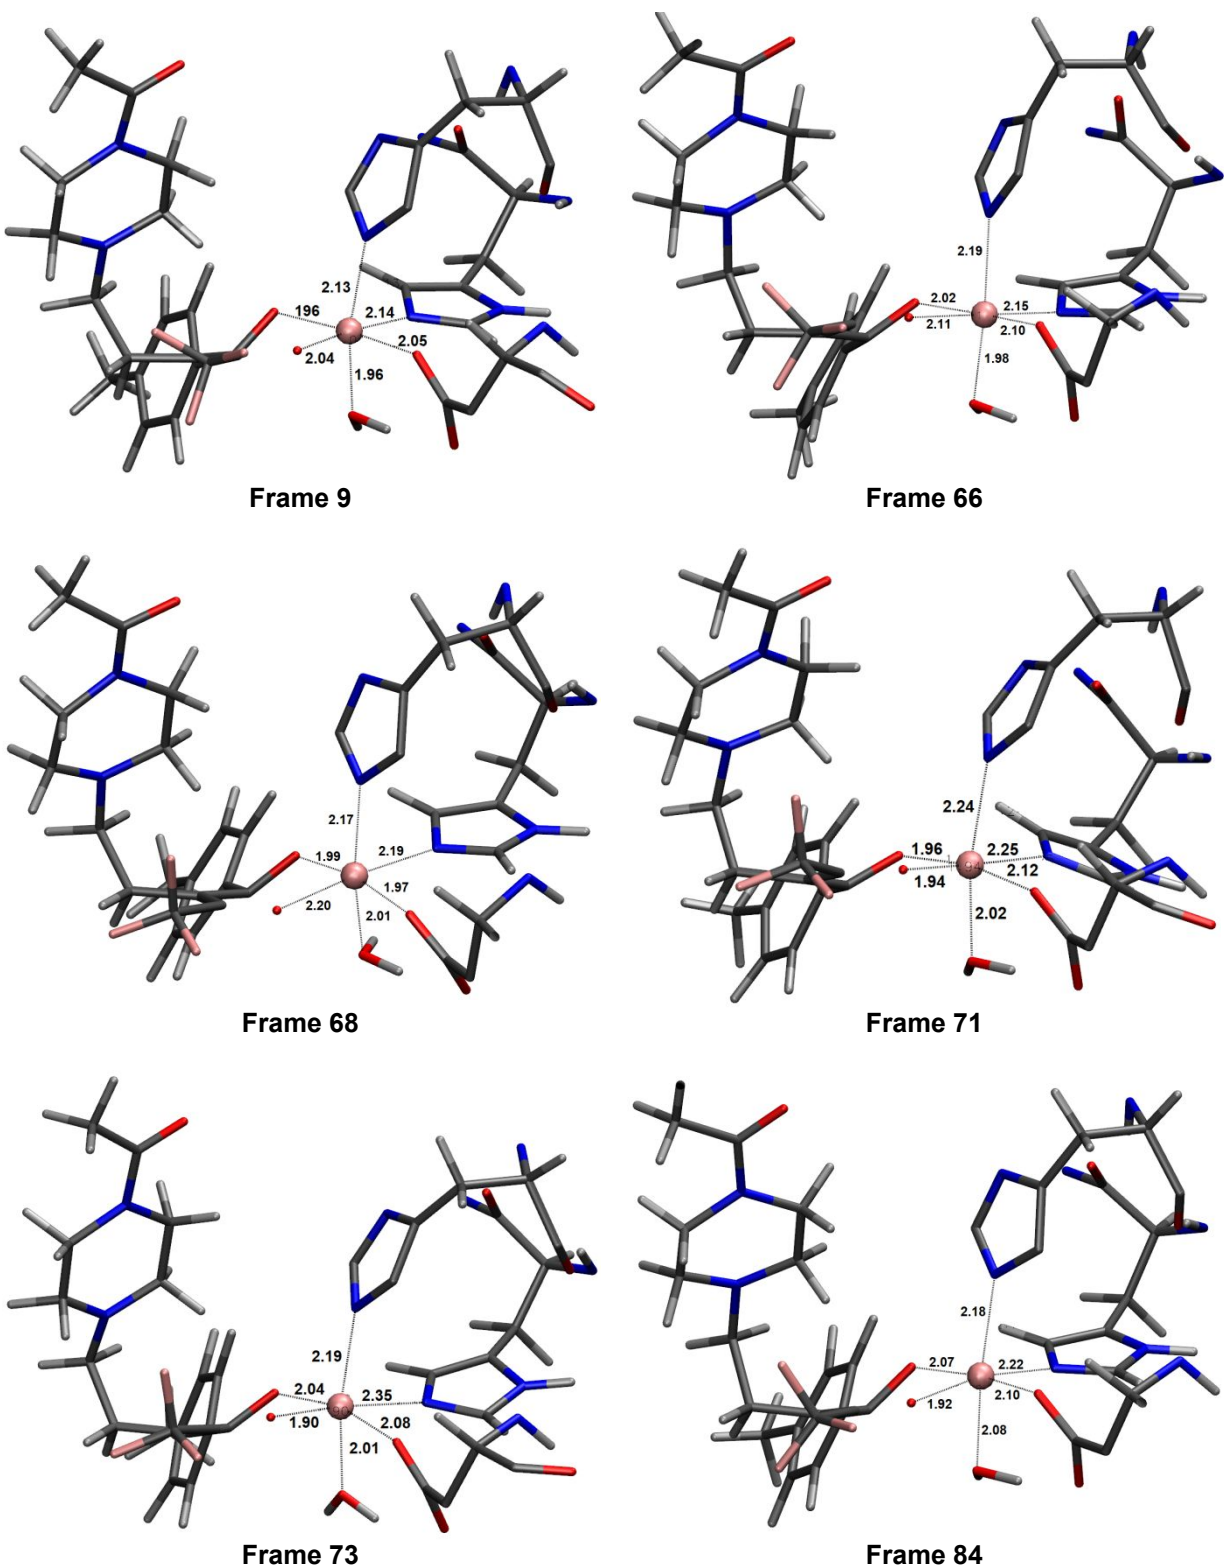

**Figure S11.** Close-up showing the distances between Fe(II) and residues of the active site in each representative structure of c28f. The distances between the iron and H666, D668, H718, ligand, and water molecule are given in each figure. The MM region is not shown for more clarity. Detailed results are given in Table S7.

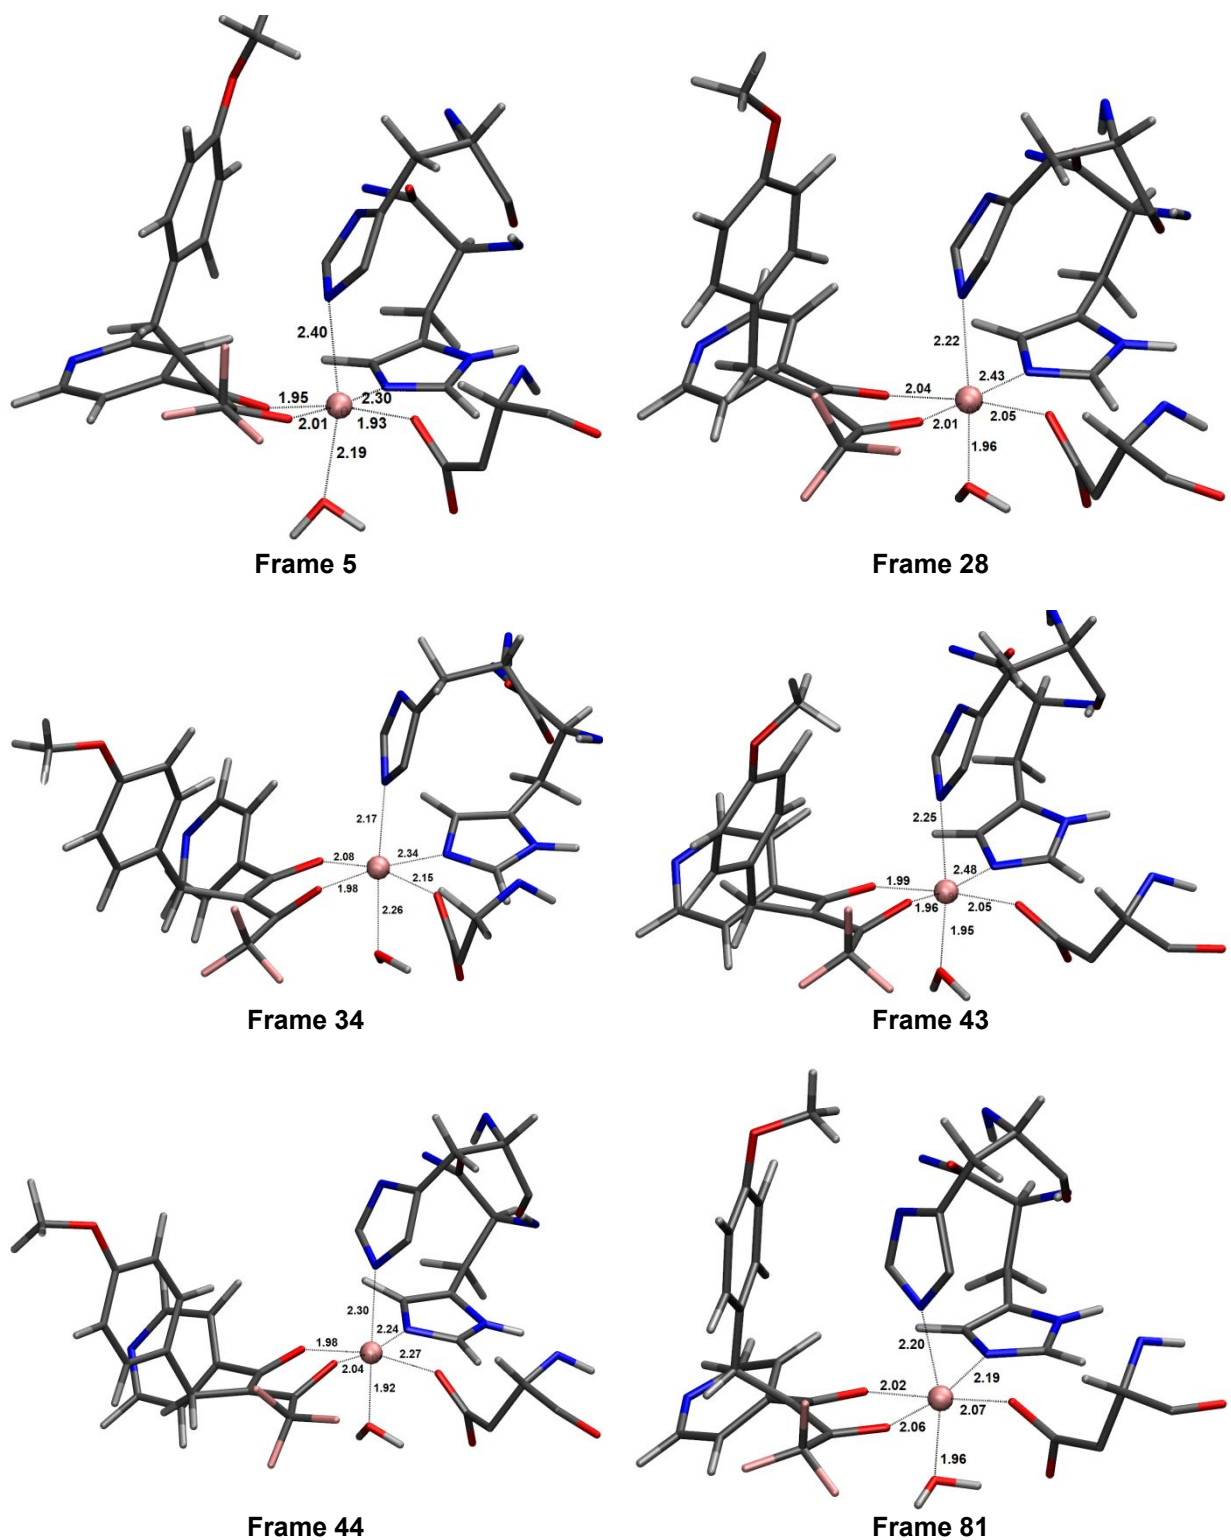

**Figure S12.** Close-up showing the distances between Fe(II) and residues of the active site in each representative structure of c2d. The distances between the iron and H666, D668, H718, ligand, and water molecule are given in each figure. The MM region is not shown for more clarity. Detailed results are given in Table S7.

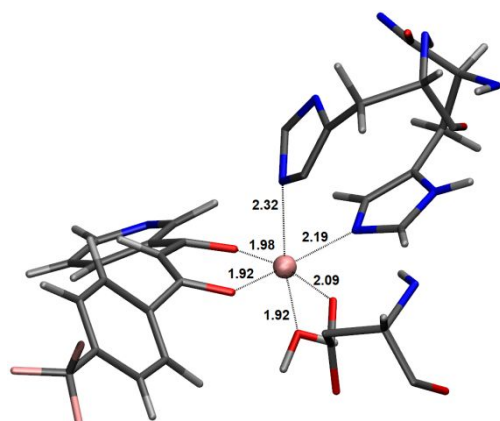

Frame 23

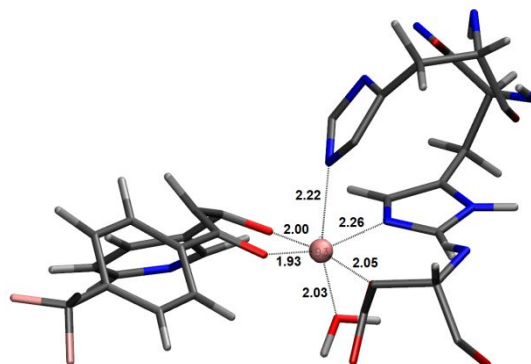

Frame 25

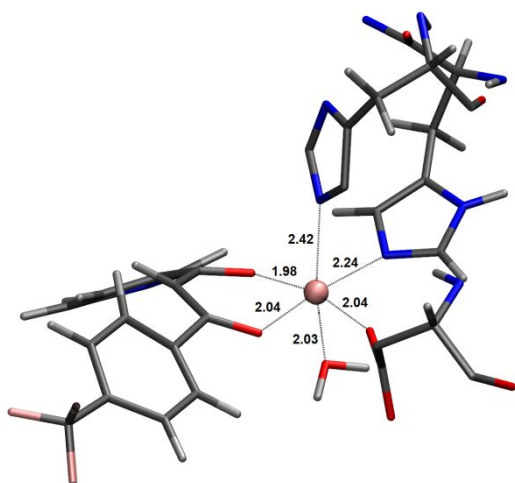

Frame 26

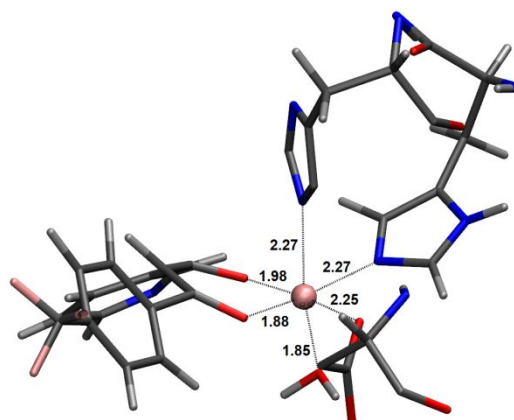

Frame 29

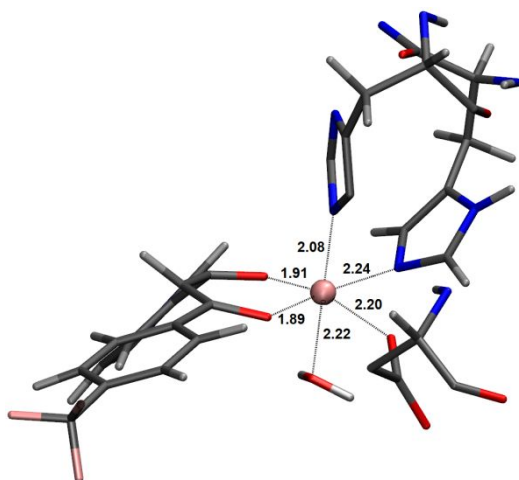

Frame 61

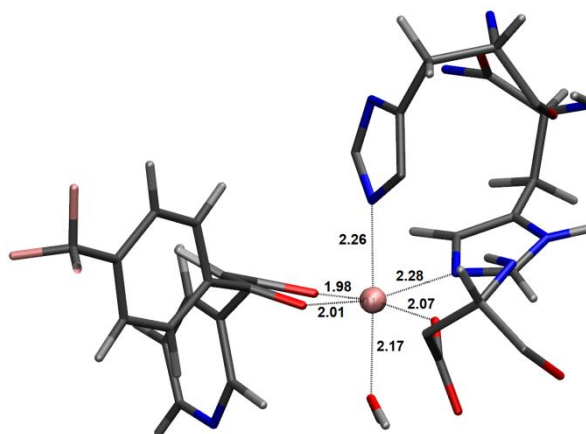

Frame 81

**Figure S13.** Close-up showing the distances between Fe(II) and residues of the active site in each representative structure of c24. The distances between the iron and H666, D668, H718, ligand, and water molecule are given in each figure. The MM region is not shown for more clarity. Detailed results are given in Table S7.

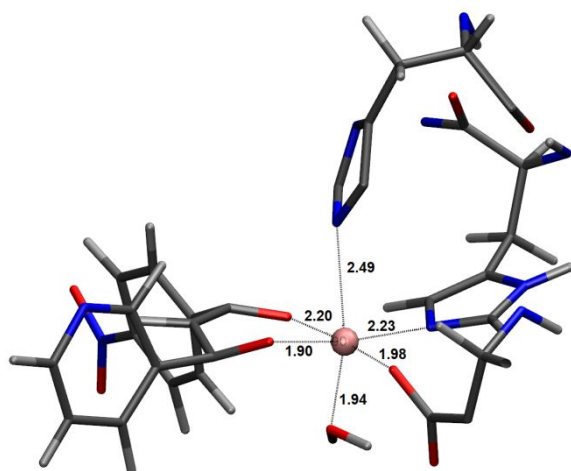

Frame 39

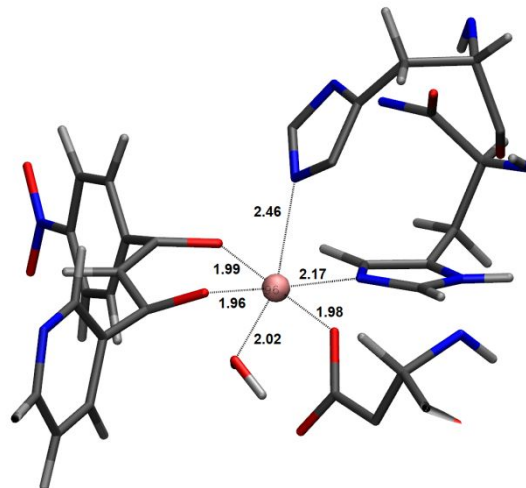

Frame 51

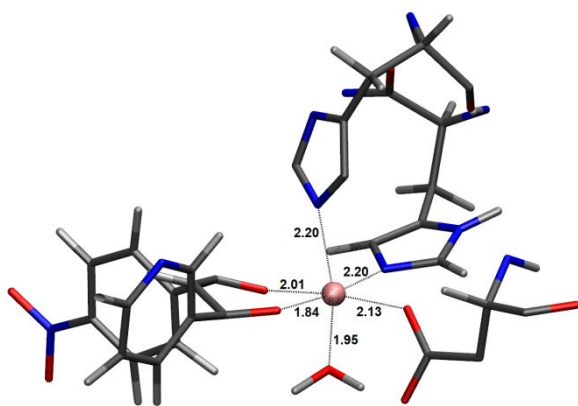

Frame 72

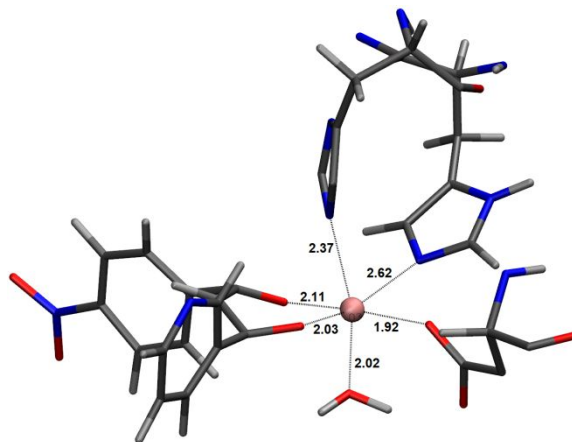

Frame 80

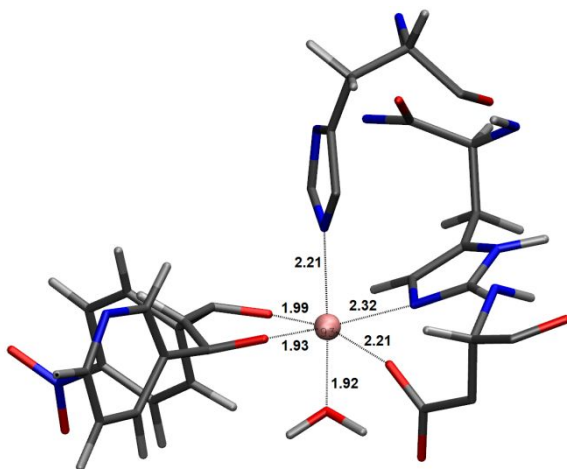

Frame 83

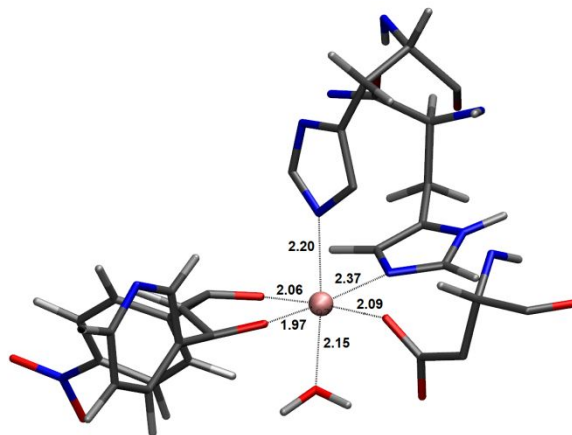

Frame 86

**Figure S14.** Close-up showing the distances between Fe(II) and residues of the active site in each representative structure of c25. The distances between the iron and H666, D668, H718, ligand, and water molecule are given in each figure. The MM region is not shown for more clarity. Detailed results are given in Table S7.

**Table S9.** Residues involved in the calculated O<sub>2</sub>-transporting tunnels for the apoenzyme and the holoenzyme with compounds of the third set.

| Residue      | Structure<br>(Total number of tunnels in all the Reprs. for each structure) |              |              |              |              |              |             |             |             | Presence<br>of Res. in<br>all Tunnels<br>(168) | Presence<br>of Res.<br>(%) | Cons.<br>score<br>by T-<br>coffee |
|--------------|-----------------------------------------------------------------------------|--------------|--------------|--------------|--------------|--------------|-------------|-------------|-------------|------------------------------------------------|----------------------------|-----------------------------------|
|              | apo<br>(25)                                                                 | c28a<br>(16) | c28b<br>(18) | c28c<br>(15) | c28e<br>(17) | c28f<br>(18) | c2d<br>(24) | c24<br>(18) | c25<br>(17) |                                                |                            |                                   |
| F651         | 18                                                                          | 14           | 1            | 15           | 12           | 15           | 8           | 11          | 17          | 111                                            | 66.1                       | *                                 |
| <b>V653*</b> | <b>24</b>                                                                   | <b>16</b>    | <b>11</b>    | <b>15</b>    | <b>17</b>    | <b>17</b>    | <b>20</b>   | <b>10</b>   | <b>17</b>   | <b>147</b>                                     | <b>87.5</b>                | *                                 |
| <b>Y655</b>  | <b>25</b>                                                                   | <b>13</b>    | <b>18</b>    | <b>11</b>    | <b>17</b>    | <b>17</b>    | <b>24</b>   | <b>14</b>   | <b>17</b>   | <b>156</b>                                     | <b>92.9</b>                | *                                 |
| S656**       | 6                                                                           | 4            | 4            | 2            | 2            | 3            | 5           | 2           | 1           | 29                                             | 17.3                       |                                   |
| P657         | 4                                                                           | 1            | 3            | 0            | 2            | 3            | 5           | 2           | 1           | 21                                             | 12.5                       | *                                 |
| R659         | 8                                                                           | 4            | 3            | 1            | 2            | 3            | 5           | 3           | 1           | 30                                             | 17.9                       | .                                 |
| Q660         | 11                                                                          | 2            | 4            | 1            | 2            | 3            | 6           | 3           | 1           | 33                                             | 19.6                       | *                                 |
| <i>R661</i>  | <i>13</i>                                                                   | <i>6</i>     | <i>7</i>     | <i>4</i>     | <i>4</i>     | <i>9</i>     | <i>7</i>    | <i>9</i>    | <i>4</i>    | <i>63</i>                                      | <i>37.5</i>                | ,                                 |
| S662         | 12                                                                          | 4            | 5            | 0            | 4            | 1            | 7           | 3           | 1           | 37                                             | 22.0                       | *                                 |
| <b>L663</b>  | <b>25</b>                                                                   | <b>14</b>    | <b>18</b>    | <b>13</b>    | <b>17</b>    | <b>9</b>     | <b>24</b>   | <b>12</b>   | <b>11</b>   | <b>142</b>                                     | <b>85.1</b>                | *                                 |
| <i>R664</i>  | <i>2</i>                                                                    | <i>4</i>     | <i>1</i>     | <i>0</i>     | <i>3</i>     | <i>0</i>     | <i>3</i>    | <i>4</i>    | <i>0</i>    | <i>17</i>                                      | <i>10.1</i>                |                                   |
| <b>H666</b>  | <b>25</b>                                                                   | <b>16</b>    | <b>18</b>    | <b>15</b>    | <b>17</b>    | <b>18</b>    | <b>24</b>   | <b>18</b>   | <b>17</b>   | <b>168</b>                                     | <b>100</b>                 | *                                 |
| H667         | 2                                                                           | 3            | 0            | 5            | 4            | 9            | 7           | 3           | 5           | 38                                             | 22.6                       | *                                 |
| <b>D668</b>  | <b>25</b>                                                                   | <b>16</b>    | <b>18</b>    | <b>15</b>    | <b>17</b>    | <b>18</b>    | <b>24</b>   | <b>18</b>   | <b>17</b>   | <b>168</b>                                     | <b>100</b>                 | *                                 |
| <b>T673</b>  | <b>25</b>                                                                   | <b>14</b>    | <b>18</b>    | <b>15</b>    | <b>17</b>    | <b>18</b>    | <b>24</b>   | <b>18</b>   | <b>17</b>   | <b>166</b>                                     | <b>98.8</b>                | *                                 |
| I674         | 7                                                                           | 4            | 18           | 9            | 11           | 11           | 24          | 7           | 1           | 92                                             | 54.8                       | :                                 |
| <b>N675</b>  | <b>25</b>                                                                   | <b>14</b>    | <b>18</b>    | <b>15</b>    | <b>17</b>    | <b>16</b>    | <b>24</b>   | <b>13</b>   | <b>17</b>   | <b>159</b>                                     | <b>94.6</b>                | *                                 |
| I676         | 0                                                                           | 1            | 0            | 3            | 4            | 0            | 3           | 0           | 1           | 12                                             | 7.14                       | :                                 |
| A677         | 0                                                                           | 1            | 3            | 3            | 5            | 1            | 5           | 2           | 5           | 25                                             | 14.9                       | *                                 |
| <i>V681</i>  | <i>0</i>                                                                    | <i>1</i>     | <i>0</i>     | <i>3</i>     | <i>3</i>     | <i>0</i>     | <i>5</i>    | <i>3</i>    | <i>3</i>    | <i>18</i>                                      | <i>10.7</i>                |                                   |
| F685         | 0                                                                           | 2            | 3            | 3            | 4            | 0            | 4           | 4           | 5           | 25                                             | 14.9                       | :                                 |
| G687         | 0                                                                           | 2            | 1            | 0            | 6            | 1            | 10          | 5           | 4           | 29                                             | 17.3                       | *                                 |
| G688         | 10                                                                          | 2            | 8            | 1            | 9            | 7            | 14          | 8           | 9           | 68                                             | 40.5                       | *                                 |
| G689         | 12                                                                          | 8            | 13           | 6            | 9            | 9            | 16          | 9           | 10          | 92                                             | 54.8                       | *                                 |
| <b>C690</b>  | <b>25</b>                                                                   | <b>14</b>    | <b>18</b>    | <b>9</b>     | <b>17</b>    | <b>13</b>    | <b>24</b>   | <b>17</b>   | <b>17</b>   | <b>154</b>                                     | <b>91.7</b>                | *                                 |
| K691         | 4                                                                           | 5            | 8            | 2            | 9            | 3            | 6           | 4           | 5           | 46                                             | 27.4                       | :                                 |
| F692         | 5                                                                           | 1            | 9            | 1            | 7            | 6            | 6           | 7           | 6           | 48                                             | 28.6                       | *                                 |
| I699         | 2                                                                           | 1            | 5            | 0            | 0            | 1            | 7           | 5           | 5           | 26                                             | 15.5                       | :                                 |
| <i>E700</i>  | <i>1</i>                                                                    | <i>1</i>     | <i>3</i>     | <i>3</i>     | <i>5</i>     | <i>1</i>     | <i>7</i>    | <i>3</i>    | <i>5</i>    | <i>29</i>                                      | <i>17.3</i>                |                                   |
| S701         | 0                                                                           | 1            | 3            | 3            | 5            | 1            | 7           | 3           | 5           | 28                                             | 16.7                       | :                                 |
| P702         | 0                                                                           | 2            | 3            | 3            | 6            | 1            | 7           | 4           | 5           | 31                                             | 18.4                       | *                                 |
| F708         | 0                                                                           | 2            | 4            | 3            | 6            | 5            | 10          | 4           | 6           | 40                                             | 23.8                       | :                                 |
| <b>H710</b>  | <b>25</b>                                                                   | <b>14</b>    | <b>18</b>    | <b>15</b>    | <b>17</b>    | <b>15</b>    | <b>24</b>   | <b>18</b>   | <b>16</b>   | <b>162</b>                                     | <b>96.4</b>                | *                                 |
| <b>H718</b>  | <b>25</b>                                                                   | <b>16</b>    | <b>18</b>    | <b>15</b>    | <b>17</b>    | <b>18</b>    | <b>24</b>   | <b>18</b>   | <b>17</b>   | <b>168</b>                                     | <b>100</b>                 | *                                 |
| <b>E719</b>  | <b>17</b>                                                                   | <b>15</b>    | <b>15</b>    | <b>13</b>    | <b>14</b>    | <b>12</b>    | <b>20</b>   | <b>16</b>   | <b>13</b>   | <b>135</b>                                     | <b>80.4</b>                | *                                 |
| <b>G720</b>  | <b>21</b>                                                                   | <b>15</b>    | <b>15</b>    | <b>13</b>    | <b>13</b>    | <b>14</b>    | <b>21</b>   | <b>13</b>   | <b>14</b>   | <b>139</b>                                     | <b>82.7</b>                | *                                 |
| L721         | 10                                                                          | 8            | 10           | 7            | 9            | 7            | 11          | 7           | 8           | 77                                             | 45.8                       | *                                 |
| P722         | 10                                                                          | 2            | 6            | 0            | 4            | 5            | 6           | 4           | 4           | 41                                             | 24.4                       | *                                 |
| <i>V723</i>  | <i>10</i>                                                                   | <i>1</i>     | <i>6</i>     | <i>0</i>     | <i>4</i>     | <i>6</i>     | <i>6</i>    | <i>5</i>    | <i>4</i>    | <i>42</i>                                      | <i>25.0</i>                |                                   |
| <i>K724</i>  | <i>1</i>                                                                    | <i>1</i>     | <i>1</i>     | <i>0</i>     | <i>2</i>     | <i>1</i>     | <i>3</i>    | <i>1</i>    | <i>1</i>    | <i>11</i>                                      | <i>6.5</i>                 |                                   |
| R728         | 10                                                                          | 3            | 12           | 6            | 9            | 8            | 23          | 10          | 9           | 90                                             | 53.6                       | *                                 |
| <b>I730</b>  | <b>15</b>                                                                   | <b>14</b>    | <b>18</b>    | <b>13</b>    | <b>17</b>    | <b>16</b>    | <b>23</b>   | <b>13</b>   | <b>17</b>   | <b>146</b>                                     | <b>86.9</b>                | *                                 |
| <b>V732</b>  | <b>25</b>                                                                   | <b>16</b>    | <b>18</b>    | <b>15</b>    | <b>17</b>    | <b>18</b>    | <b>24</b>   | <b>18</b>   | <b>17</b>   | <b>168</b>                                     | <b>100</b>                 | *                                 |
| <b>F734</b>  | <b>25</b>                                                                   | <b>14</b>    | <b>10</b>    | <b>15</b>    | <b>15</b>    | <b>18</b>    | <b>19</b>   | <b>18</b>   | <b>3</b>    | <b>137</b>                                     | <b>81.5</b>                | *                                 |

\* Residues in bold text have the presence percentage of more than %80 in the calculated tunnels and all of them are completely conserved in the studied organisms.

\*\* Residues in the italic text correspond to the not-conserved residues in the studied organism and they show the lowest presence in the calculated tunnels.

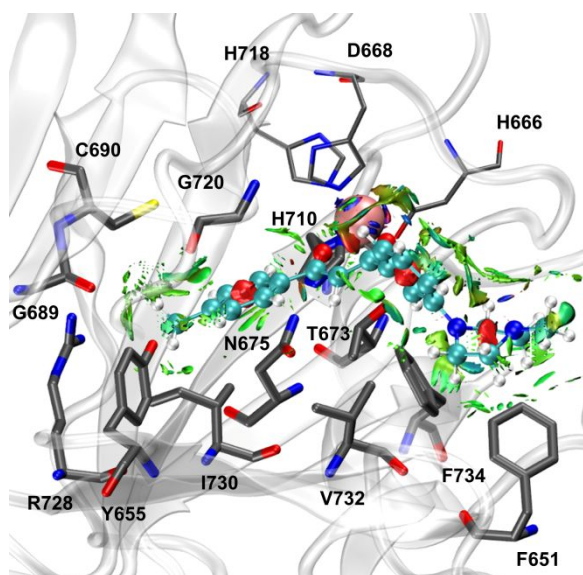

39- c28c

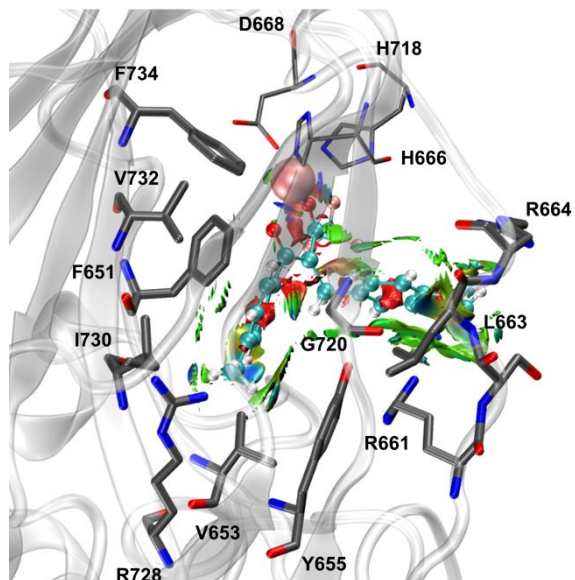

40- c28e

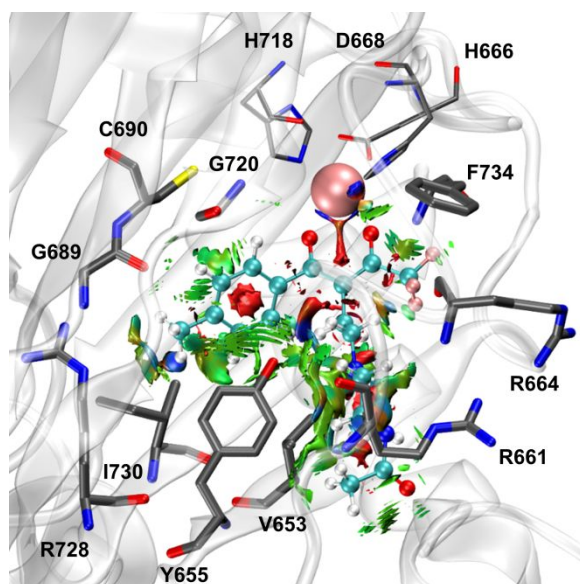

41- c28f

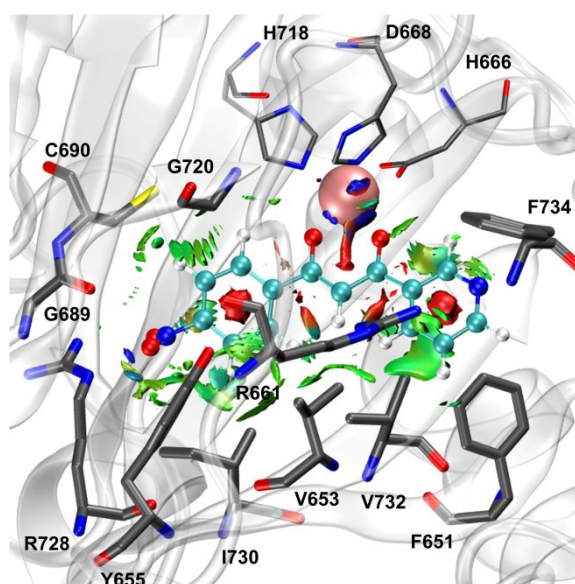

44- c25

**Figure S15.** Averaged non-covalent interactions (aNCI) between compounds of the third set and their surrounding residues. The isosurface cutoff is 0.35 au, and the data is plotted in the color range  $-0.05 < \text{sign}(\lambda_2)\rho < 0.05$  au. Residues H666, D668, and H718 are shown in thin sticks, ligand atoms are in ball-and-sticks (with different color code),  $\text{Fe}^{2+}$  is in pink vdW sphere, and the surrounding residues with the non-covalent interactions are in thick sticks. Hydrogen atoms are not shown for more clarity.

**Table S10.** Amino acid residues showing averaged non-covalent interactions (aNCI) with each compound of third set (ID: 37–44). “√” means the residue has NCI with the ligand.

| Ligand | Non-covalent interacting residues |      |      |      |      |      |      |      |      |      |      |      |      |      |      |      |      |
|--------|-----------------------------------|------|------|------|------|------|------|------|------|------|------|------|------|------|------|------|------|
|        | F651                              | V653 | Y655 | R661 | L663 | R664 | T673 | N675 | G689 | C690 | H710 | E719 | G720 | R728 | I730 | V732 | F734 |
| c28a   | √                                 | √    | √    |      | √    |      |      | √    | √    | √    |      |      | √    | √    | √    | √    | √    |
| c28b   | √                                 |      | √    | √    | √    |      | √    | √    | √    | √    |      | √    | √    | √    | √    | √    | √    |
| c28c   | √                                 |      | √    |      |      |      | √    | √    | √    |      | √    |      | √    | √    | √    | √    | √    |
| c28e   | √                                 | √    | √    | √    | √    | √    |      |      |      |      |      |      | √    | √    | √    | √    | √    |
| c28f   |                                   | √    | √    | √    |      | √    |      |      | √    | √    |      |      | √    | √    | √    | √    | √    |
| c2d    | √                                 | √    |      | √    | √    | √    | √    |      |      |      |      |      | √    | √    | √    |      | √    |
| c24    | √                                 | √    | √    | √    |      |      |      |      | √    | √    |      |      | √    | √    | √    | √    | √    |
| c25    | √                                 | √    | √    |      | √    |      |      | √    |      | √    |      |      | √    | √    |      | √    | √    |







**Table S13.** Residues involved in all the possible O<sub>2</sub>-transporting tunnels for the LH2-c28b. The “√” shows the presence of the residue in the tunnel of interest.

| c28-b | F196 | V194 | I192 | R190 | K186 | V185 | P184 | L183 | G182 | E181 | H180 | H172 | F170 | P164 | S163 | E162 | I161 | F154 | K153 | C152 | G151 | G150 | G149 | F147 | A139 | N137 | I136 | T135 | D130 | H129 | H128 | P127 | R126 | L125 | S124 | R123 | Q122 | R121 | P119 | S118 | Y117 | V115 | F113 | W29 | P23 |   |   |   |   |   |   |
|-------|------|------|------|------|------|------|------|------|------|------|------|------|------|------|------|------|------|------|------|------|------|------|------|------|------|------|------|------|------|------|------|------|------|------|------|------|------|------|------|------|------|------|------|-----|-----|---|---|---|---|---|---|
| 14-t1 | √    | √    | √    | √    | √    | √    | √    | √    | √    | √    | √    | √    | √    | √    | √    | √    | √    | √    | √    | √    | √    | √    | √    | √    | √    | √    | √    | √    | √    | √    | √    | √    | √    | √    | √    | √    | √    | √    | √    | √    | √    | √    | √    | √   | √   |   |   |   |   |   |   |
| 19-t1 | √    | √    | √    | √    | √    | √    | √    | √    | √    | √    | √    | √    | √    | √    | √    | √    | √    | √    | √    | √    | √    | √    | √    | √    | √    | √    | √    | √    | √    | √    | √    | √    | √    | √    | √    | √    | √    | √    | √    | √    | √    | √    | √    | √   | √   | √ |   |   |   |   |   |
| 54-t1 | √    | √    | √    | √    | √    | √    | √    | √    | √    | √    | √    | √    | √    | √    | √    | √    | √    | √    | √    | √    | √    | √    | √    | √    | √    | √    | √    | √    | √    | √    | √    | √    | √    | √    | √    | √    | √    | √    | √    | √    | √    | √    | √    | √   | √   | √ |   |   |   |   |   |
| 76-t1 | √    | √    | √    | √    | √    | √    | √    | √    | √    | √    | √    | √    | √    | √    | √    | √    | √    | √    | √    | √    | √    | √    | √    | √    | √    | √    | √    | √    | √    | √    | √    | √    | √    | √    | √    | √    | √    | √    | √    | √    | √    | √    | √    | √   | √   | √ |   |   |   |   |   |
| 95-t1 | √    | √    | √    | √    | √    | √    | √    | √    | √    | √    | √    | √    | √    | √    | √    | √    | √    | √    | √    | √    | √    | √    | √    | √    | √    | √    | √    | √    | √    | √    | √    | √    | √    | √    | √    | √    | √    | √    | √    | √    | √    | √    | √    | √   | √   | √ |   |   |   |   |   |
| 96-t1 | √    | √    | √    | √    | √    | √    | √    | √    | √    | √    | √    | √    | √    | √    | √    | √    | √    | √    | √    | √    | √    | √    | √    | √    | √    | √    | √    | √    | √    | √    | √    | √    | √    | √    | √    | √    | √    | √    | √    | √    | √    | √    | √    | √   | √   | √ | √ |   |   |   |   |
| 14-t2 | √    | √    | √    | √    | √    | √    | √    | √    | √    | √    | √    | √    | √    | √    | √    | √    | √    | √    | √    | √    | √    | √    | √    | √    | √    | √    | √    | √    | √    | √    | √    | √    | √    | √    | √    | √    | √    | √    | √    | √    | √    | √    | √    | √   | √   | √ | √ |   |   |   |   |
| 19-t2 | √    | √    | √    | √    | √    | √    | √    | √    | √    | √    | √    | √    | √    | √    | √    | √    | √    | √    | √    | √    | √    | √    | √    | √    | √    | √    | √    | √    | √    | √    | √    | √    | √    | √    | √    | √    | √    | √    | √    | √    | √    | √    | √    | √   | √   | √ | √ |   |   |   |   |
| 54-t2 | √    | √    | √    | √    | √    | √    | √    | √    | √    | √    | √    | √    | √    | √    | √    | √    | √    | √    | √    | √    | √    | √    | √    | √    | √    | √    | √    | √    | √    | √    | √    | √    | √    | √    | √    | √    | √    | √    | √    | √    | √    | √    | √    | √   | √   | √ | √ | √ |   |   |   |
| 76-t2 | √    | √    | √    | √    | √    | √    | √    | √    | √    | √    | √    | √    | √    | √    | √    | √    | √    | √    | √    | √    | √    | √    | √    | √    | √    | √    | √    | √    | √    | √    | √    | √    | √    | √    | √    | √    | √    | √    | √    | √    | √    | √    | √    | √   | √   | √ | √ | √ |   |   |   |
| 95-t2 | √    | √    | √    | √    | √    | √    | √    | √    | √    | √    | √    | √    | √    | √    | √    | √    | √    | √    | √    | √    | √    | √    | √    | √    | √    | √    | √    | √    | √    | √    | √    | √    | √    | √    | √    | √    | √    | √    | √    | √    | √    | √    | √    | √   | √   | √ | √ | √ |   |   |   |
| 96-t2 | √    | √    | √    | √    | √    | √    | √    | √    | √    | √    | √    | √    | √    | √    | √    | √    | √    | √    | √    | √    | √    | √    | √    | √    | √    | √    | √    | √    | √    | √    | √    | √    | √    | √    | √    | √    | √    | √    | √    | √    | √    | √    | √    | √   | √   | √ | √ | √ | √ |   |   |
| 14-t3 | √    | √    | √    | √    | √    | √    | √    | √    | √    | √    | √    | √    | √    | √    | √    | √    | √    | √    | √    | √    | √    | √    | √    | √    | √    | √    | √    | √    | √    | √    | √    | √    | √    | √    | √    | √    | √    | √    | √    | √    | √    | √    | √    | √   | √   | √ | √ | √ | √ |   |   |
| 19-t3 | √    | √    | √    | √    | √    | √    | √    | √    | √    | √    | √    | √    | √    | √    | √    | √    | √    | √    | √    | √    | √    | √    | √    | √    | √    | √    | √    | √    | √    | √    | √    | √    | √    | √    | √    | √    | √    | √    | √    | √    | √    | √    | √    | √   | √   | √ | √ | √ | √ | √ |   |
| 54-t3 | √    | √    | √    | √    | √    | √    | √    | √    | √    | √    | √    | √    | √    | √    | √    | √    | √    | √    | √    | √    | √    | √    | √    | √    | √    | √    | √    | √    | √    | √    | √    | √    | √    | √    | √    | √    | √    | √    | √    | √    | √    | √    | √    | √   | √   | √ | √ | √ | √ | √ |   |
| 76-t3 | √    | √    | √    | √    | √    | √    | √    | √    | √    | √    | √    | √    | √    | √    | √    | √    | √    | √    | √    | √    | √    | √    | √    | √    | √    | √    | √    | √    | √    | √    | √    | √    | √    | √    | √    | √    | √    | √    | √    | √    | √    | √    | √    | √   | √   | √ | √ | √ | √ | √ |   |
| 95-t3 | √    | √    | √    | √    | √    | √    | √    | √    | √    | √    | √    | √    | √    | √    | √    | √    | √    | √    | √    | √    | √    | √    | √    | √    | √    | √    | √    | √    | √    | √    | √    | √    | √    | √    | √    | √    | √    | √    | √    | √    | √    | √    | √    | √   | √   | √ | √ | √ | √ | √ |   |
| 96-t3 | √    | √    | √    | √    | √    | √    | √    | √    | √    | √    | √    | √    | √    | √    | √    | √    | √    | √    | √    | √    | √    | √    | √    | √    | √    | √    | √    | √    | √    | √    | √    | √    | √    | √    | √    | √    | √    | √    | √    | √    | √    | √    | √    | √   | √   | √ | √ | √ | √ | √ | √ |

Key to get the correct residue numbers of the Human LH2 enzyme: (Residue Number in table) + 538 = correct number. *Example: H128 + 538 = H666*

**Table S14.** Residues involved in all the possible O<sub>2</sub>-transporting tunnels for the LH2–c28c. The “√” shows the presence of the residue in the tunnel of interest.

| c28-c | W29 | S52 | D71 | D72 | F113 | V114 | V115 | K116 | Y117 | S118 | R121 | Q122 | R123 | L125 | H128 | H129 | D130 | T135 | I136 | N137 | I138 | A139 | V143 | F147 | G150 | G151 | C152 | K153 | F154 | E162 | S163 | P164 | F170 | H172 | H180 | E181 | G182 | L183 | R190 | I192 | V194 | F196 |   |   |   |   |
|-------|-----|-----|-----|-----|------|------|------|------|------|------|------|------|------|------|------|------|------|------|------|------|------|------|------|------|------|------|------|------|------|------|------|------|------|------|------|------|------|------|------|------|------|------|---|---|---|---|
| 12-t1 |     |     |     |     | √    |      | √    |      | √    |      |      |      |      |      | √    | √    | √    | √    | √    | √    | √    |      |      |      |      |      | √    |      |      |      |      |      |      |      | √    | √    | √    | √    | √    |      |      | √    | √ | √ | √ |   |
| 14-t1 |     |     |     |     | √    |      | √    |      |      |      |      |      |      |      | √    | √    | √    | √    | √    | √    | √    |      |      |      |      |      |      |      |      |      |      |      |      |      |      | √    | √    | √    | √    | √    |      |      | √ | √ | √ | √ |
| 73-t1 |     |     |     |     | √    |      | √    |      |      | √    |      |      |      |      | √    | √    | √    | √    | √    | √    | √    |      |      |      |      |      |      | √    |      |      |      |      |      |      |      | √    | √    | √    | √    | √    |      |      | √ | √ | √ | √ |
| 76-t1 |     |     |     |     | √    |      | √    |      |      | √    |      |      |      |      | √    | √    | √    | √    | √    | √    | √    |      |      |      |      |      |      |      |      |      |      |      |      |      |      | √    | √    | √    | √    | √    |      |      | √ | √ | √ | √ |
| 85-t1 |     |     |     | √   |      |      | √    |      |      | √    |      |      |      |      | √    | √    | √    | √    | √    | √    | √    |      |      |      |      |      |      |      |      |      |      |      |      |      |      | √    | √    | √    | √    | √    |      |      | √ | √ | √ | √ |
| 87-t1 |     |     |     |     | √    |      | √    |      |      | √    |      |      |      |      | √    | √    | √    | √    | √    | √    | √    |      |      |      |      |      |      |      |      |      |      |      |      |      |      | √    | √    | √    | √    | √    |      |      | √ | √ | √ | √ |
| 12-t2 |     |     |     |     | √    |      | √    |      |      |      |      |      |      |      | √    | √    | √    | √    | √    | √    | √    |      |      |      |      |      |      |      |      |      |      |      |      |      |      | √    | √    | √    | √    | √    |      |      | √ | √ | √ | √ |
| 73-t2 | √   |     |     |     | √    |      | √    |      |      |      |      |      |      |      | √    | √    | √    | √    | √    | √    | √    |      | √    |      | √    |      |      |      |      |      |      |      |      |      | √    | √    | √    | √    | √    |      |      | √    | √ | √ | √ |   |
| 76-t2 |     |     |     |     | √    |      | √    |      |      | √    |      |      |      |      | √    | √    | √    | √    | √    | √    | √    |      |      |      |      |      |      | √    |      |      |      |      |      |      |      | √    | √    | √    | √    | √    |      |      | √ | √ | √ | √ |
| 85-t2 |     |     |     |     | √    |      | √    |      |      | √    |      |      |      | √    | √    | √    | √    | √    | √    | √    | √    |      |      |      |      |      | √    |      |      |      |      |      |      |      |      | √    | √    | √    | √    | √    |      |      | √ | √ | √ | √ |
| 87-t2 |     |     |     | √   | √    |      | √    |      |      | √    |      |      |      | √    | √    | √    | √    | √    | √    | √    | √    |      |      |      |      |      |      |      |      |      |      |      |      |      |      | √    | √    | √    | √    | √    |      |      | √ | √ | √ | √ |
| 12-t3 |     |     |     |     | √    |      | √    | √    | √    | √    |      |      |      | √    | √    | √    | √    | √    | √    | √    | √    |      |      |      |      |      |      | √    |      |      |      |      |      |      |      | √    | √    | √    | √    | √    |      |      | √ | √ | √ | √ |
| 76-t3 | √   |     |     |     | √    |      | √    |      |      | √    |      |      |      |      | √    | √    | √    | √    | √    | √    | √    |      | √    |      | √    |      |      |      |      |      |      |      |      |      | √    | √    | √    | √    | √    |      |      | √    | √ | √ | √ |   |
| 85-t3 |     | √   |     | √   | √    |      | √    |      |      | √    |      |      | √    | √    | √    | √    | √    | √    | √    | √    | √    |      |      |      |      |      | √    |      |      |      |      |      |      |      |      | √    | √    | √    | √    | √    |      |      | √ | √ | √ | √ |
| 87-t3 |     |     |     |     | √    |      | √    |      |      | √    |      |      |      | √    | √    | √    | √    | √    | √    | √    | √    |      |      |      |      |      |      |      |      |      |      |      |      |      |      | √    | √    | √    | √    | √    |      |      | √ | √ | √ | √ |

Key to get the correct residue numbers of the Human LH2 enzyme: (Residue Number in table) + 538 = correct number. *Example: H128 + 538 = H666*

**Table S15.** Residues involved in all the possible O<sub>2</sub>-transporting tunnels for the LH2-c28e. The “√” shows the presence of the residue in the tunnel of interest.

| c28-e | P23 | W29 | F113 | V114 | V115 | K116 | Y117 | S118 | P119 | R121 | Q122 | R123 | S124 | L125 | R126 | H128 | H129 | D130 | T135 | I136 | N137 | I138 | A139 | V143 | F147 | Q148 | G149 | G150 | G151 | C152 | K153 | F154 | I161 | E162 | S163 | P164 | F170 | H172 | H180 | E181 | G182 | L183 | P184 | V185 | R190 | I192 | V194 | F196 |   |   |   |   |   |   |   |   |   |   |   |   |   |   |   |   |   |   |   |   |  |  |  |   |   |   |   |   |   |
|-------|-----|-----|------|------|------|------|------|------|------|------|------|------|------|------|------|------|------|------|------|------|------|------|------|------|------|------|------|------|------|------|------|------|------|------|------|------|------|------|------|------|------|------|------|------|------|------|------|------|---|---|---|---|---|---|---|---|---|---|---|---|---|---|---|---|---|---|---|---|--|--|--|---|---|---|---|---|---|
| 2-t1  |     |     | √    |      | √    |      | √    |      |      |      |      |      |      | √    |      | √    | √    | √    | √    | √    | √    | √    |      |      |      |      |      |      | √    |      |      |      |      |      |      |      |      |      |      |      |      |      |      |      |      | √    | √    | √    | √ | √ | √ |   |   |   |   |   |   |   |   |   |   |   |   |   |   |   |   |   |  |  |  |   |   |   |   |   |   |
| 36-t1 |     |     | √    |      | √    |      | √    |      |      |      |      |      |      | √    |      | √    | √    | √    | √    | √    | √    | √    |      |      |      |      |      |      |      | √    |      |      |      |      |      |      |      |      |      |      |      |      |      |      |      |      |      |      | √ | √ | √ | √ | √ | √ |   |   |   |   |   |   |   |   |   |   |   |   |   |   |  |  |  |   |   |   |   |   |   |
| 57-t1 |     |     |      |      |      |      |      |      |      |      |      |      |      |      |      | √    |      | √    | √    | √    | √    | √    |      |      |      |      |      |      |      |      |      |      |      |      |      |      |      |      |      |      |      |      |      |      |      |      |      |      |   |   | √ | √ | √ | √ | √ | √ |   |   |   |   |   |   |   |   |   |   |   |   |  |  |  |   |   |   |   |   |   |
| 71-t1 |     |     | √    |      | √    |      | √    |      |      |      |      |      |      | √    |      | √    | √    | √    | √    | √    | √    | √    |      |      |      |      |      |      |      |      |      |      |      |      |      |      |      |      |      |      |      |      |      |      |      |      |      |      |   |   |   | √ | √ | √ | √ | √ | √ |   |   |   |   |   |   |   |   |   |   |   |  |  |  |   |   |   |   |   |   |
| 72-t1 |     |     | √    |      | √    |      | √    |      |      |      |      |      |      | √    |      | √    | √    | √    | √    | √    | √    | √    |      |      |      |      |      |      |      |      |      |      |      |      |      |      |      |      |      |      |      |      |      |      |      |      |      |      |   |   |   |   | √ | √ | √ | √ | √ | √ |   |   |   |   |   |   |   |   |   |   |  |  |  |   |   |   |   |   |   |
| 78-t1 |     |     | √    |      | √    |      | √    |      |      |      |      |      |      | √    |      | √    | √    | √    | √    | √    | √    | √    |      |      |      |      |      |      |      |      |      |      |      |      |      |      |      |      |      |      |      |      |      |      |      |      |      |      |   |   |   |   | √ | √ | √ | √ | √ | √ |   |   |   |   |   |   |   |   |   |   |  |  |  |   |   |   |   |   |   |
| 2-t2  | √   | √   |      |      | √    |      | √    |      |      |      |      |      |      | √    |      | √    | √    | √    | √    | √    | √    | √    |      |      |      |      |      |      |      |      |      |      |      |      |      |      |      |      |      |      |      |      |      |      |      |      |      |      |   |   |   | √ | √ | √ | √ | √ | √ |   |   |   |   |   |   |   |   |   |   |   |  |  |  |   |   |   |   |   |   |
| 36-t2 |     |     | √    |      | √    |      | √    |      |      |      |      |      |      | √    |      | √    | √    | √    | √    | √    | √    | √    |      |      |      |      |      |      |      |      |      |      |      |      |      |      |      |      |      |      |      |      |      |      |      |      |      |      |   |   |   |   |   | √ | √ | √ | √ | √ | √ |   |   |   |   |   |   |   |   |   |  |  |  |   |   |   |   |   |   |
| 57-t2 |     |     |      |      |      |      |      |      |      |      |      |      |      |      |      |      |      |      |      |      |      |      |      |      |      |      |      |      |      |      |      |      |      |      |      |      |      |      |      |      |      |      |      |      |      |      |      |      |   |   |   |   |   |   |   | √ | √ | √ | √ | √ | √ |   |   |   |   |   |   |   |  |  |  |   |   |   |   |   |   |
| 71-t2 |     |     | √    |      | √    |      | √    |      |      |      |      |      |      | √    |      | √    | √    | √    | √    | √    | √    | √    |      |      |      |      |      |      |      |      |      |      |      |      |      |      |      |      |      |      |      |      |      |      |      |      |      |      |   |   |   |   |   |   |   | √ | √ | √ | √ | √ | √ |   |   |   |   |   |   |   |  |  |  |   |   |   |   |   |   |
| 72-t2 |     |     | √    |      | √    |      | √    |      |      |      |      |      |      | √    |      | √    | √    | √    | √    | √    | √    | √    |      |      |      |      |      |      |      |      |      |      |      |      |      |      |      |      |      |      |      |      |      |      |      |      |      |      |   |   |   |   |   |   |   |   | √ | √ | √ | √ | √ | √ |   |   |   |   |   |   |  |  |  |   |   |   |   |   |   |
| 78-t2 |     |     |      |      |      |      |      |      |      |      |      |      |      |      |      |      |      |      |      |      |      |      |      |      |      |      |      |      |      |      |      |      |      |      |      |      |      |      |      |      |      |      |      |      |      |      |      |      |   |   |   |   |   |   |   |   |   | √ | √ | √ | √ | √ | √ |   |   |   |   |   |  |  |  |   |   |   |   |   |   |
| 2-t3  |     |     | √    |      | √    |      | √    |      |      |      |      |      |      | √    |      | √    | √    | √    | √    | √    | √    | √    |      |      |      |      |      |      |      |      |      |      |      |      |      |      |      |      |      |      |      |      |      |      |      |      |      |      |   |   |   |   |   |   |   |   | √ | √ | √ | √ | √ | √ |   |   |   |   |   |   |  |  |  |   |   |   |   |   |   |
| 57-t3 |     |     |      |      |      |      |      |      |      |      |      |      |      |      |      |      |      |      |      |      |      |      |      |      |      |      |      |      |      |      |      |      |      |      |      |      |      |      |      |      |      |      |      |      |      |      |      |      |   |   |   |   |   |   |   |   |   |   | √ | √ | √ | √ | √ | √ |   |   |   |   |  |  |  |   |   |   |   |   |   |
| 71-t3 |     |     |      |      |      |      |      |      |      |      |      |      |      |      |      |      |      |      |      |      |      |      |      |      |      |      |      |      |      |      |      |      |      |      |      |      |      |      |      |      |      |      |      |      |      |      |      |      |   |   |   |   |   |   |   |   |   |   |   |   |   |   | √ | √ | √ | √ | √ | √ |  |  |  |   |   |   |   |   |   |
| 72-t3 |     |     | √    |      | √    |      | √    |      |      |      |      |      |      | √    |      | √    | √    | √    | √    | √    | √    | √    |      |      |      |      |      |      |      |      |      |      |      |      |      |      |      |      |      |      |      |      |      |      |      |      |      |      |   |   |   |   |   |   |   |   |   |   |   |   |   | √ | √ | √ | √ | √ | √ |   |  |  |  |   |   |   |   |   |   |
| 78-t3 |     |     |      |      |      |      |      |      |      |      |      |      |      |      |      |      |      |      |      |      |      |      |      |      |      |      |      |      |      |      |      |      |      |      |      |      |      |      |      |      |      |      |      |      |      |      |      |      |   |   |   |   |   |   |   |   |   |   |   |   |   |   |   |   |   |   |   |   |  |  |  | √ | √ | √ | √ | √ | √ |

Key to get the correct residue numbers of the Human LH2 enzyme: (Residue Number in table) + 538 = correct number. *Example: H128 + 538 = H666*

**Table S16.** Residues involved in all the possible O<sub>2</sub>-transporting tunnels for the LH2–c28f. The “√” shows the presence of the residue in the tunnel of interest.

| 28-f  | P23 | W29 | F113 | V114 | V115 | K116 | Y117 | S118 | P119 | R121 | Q122 | R123 | S124 | L125 | H128 | H129 | D130 | T135 | I136 | N137 | A139 | G149 | G150 | G151 | C152 | K153 | F154 | I161 | E162 | S163 | P164 | F170 | H172 | H180 | E181 | G182 | L183 | P184 | V185 | K186 | R190 | I192 | V194 | F196 |   |   |   |   |   |   |   |   |   |   |   |   |   |   |   |   |   |
|-------|-----|-----|------|------|------|------|------|------|------|------|------|------|------|------|------|------|------|------|------|------|------|------|------|------|------|------|------|------|------|------|------|------|------|------|------|------|------|------|------|------|------|------|------|------|---|---|---|---|---|---|---|---|---|---|---|---|---|---|---|---|---|
| 9-t1  |     |     | √    |      |      |      | √    |      |      |      |      | √    |      |      | √    | √    | √    | √    | √    | √    |      |      |      |      | √    |      |      |      |      |      |      |      |      | √    | √    | √    | √    | √    | √    | √    | √    | √    | √    | √    | √ | √ | √ | √ | √ |   |   |   |   |   |   |   |   |   |   |   |   |
| 66-t1 |     |     | √    |      |      |      | √    |      |      |      |      |      |      |      | √    | √    | √    | √    | √    | √    |      |      |      |      | √    |      |      |      |      |      |      |      |      |      | √    | √    | √    | √    | √    | √    | √    | √    | √    | √    | √ | √ | √ | √ | √ | √ |   |   |   |   |   |   |   |   |   |   |   |
| 68-t1 |     |     | √    |      |      |      | √    |      |      |      |      |      |      |      | √    | √    | √    | √    | √    | √    |      |      |      |      | √    |      |      |      |      |      |      |      |      |      |      | √    | √    | √    | √    | √    | √    | √    | √    | √    | √ | √ | √ | √ | √ | √ | √ |   |   |   |   |   |   |   |   |   |   |
| 71-t1 |     |     | √    |      |      |      | √    |      |      |      |      |      |      |      | √    | √    | √    | √    | √    | √    |      |      |      |      | √    |      |      |      |      |      |      |      |      |      |      | √    | √    | √    | √    | √    | √    | √    | √    | √    | √ | √ | √ | √ | √ | √ | √ | √ |   |   |   |   |   |   |   |   |   |
| 73-t1 |     |     | √    |      |      |      | √    |      |      |      |      |      |      |      | √    | √    | √    | √    | √    | √    |      |      |      |      | √    |      |      |      |      |      |      |      |      |      |      | √    | √    | √    | √    | √    | √    | √    | √    | √    | √ | √ | √ | √ | √ | √ | √ | √ |   |   |   |   |   |   |   |   |   |
| 84-t1 |     |     | √    |      |      |      | √    |      |      |      |      |      |      |      | √    | √    | √    | √    | √    | √    |      |      |      |      | √    |      |      |      |      |      |      |      |      |      |      | √    | √    | √    | √    | √    | √    | √    | √    | √    | √ | √ | √ | √ | √ | √ | √ | √ | √ |   |   |   |   |   |   |   |   |
| 9-t2  |     |     | √    |      |      |      | √    |      |      |      |      |      |      |      | √    | √    | √    | √    | √    | √    |      |      |      |      | √    |      |      |      |      |      |      |      |      |      | √    | √    | √    | √    | √    | √    | √    | √    | √    | √    | √ | √ | √ | √ | √ | √ | √ | √ | √ |   |   |   |   |   |   |   |   |
| 66-t2 |     |     | √    |      |      |      | √    |      |      |      |      |      |      |      | √    | √    | √    | √    | √    | √    |      |      |      |      | √    |      |      |      |      |      |      |      |      |      |      | √    | √    | √    | √    | √    | √    | √    | √    | √    | √ | √ | √ | √ | √ | √ | √ | √ | √ | √ |   |   |   |   |   |   |   |
| 68-t2 |     |     | √    |      |      |      | √    |      |      |      |      |      |      |      | √    | √    | √    | √    | √    | √    |      |      |      |      | √    |      |      |      |      |      |      |      |      |      |      |      | √    | √    | √    | √    | √    | √    | √    | √    | √ | √ | √ | √ | √ | √ | √ | √ | √ | √ | √ |   |   |   |   |   |   |
| 71-t2 |     |     | √    |      |      |      | √    |      |      |      |      |      |      |      | √    | √    | √    | √    | √    | √    |      |      |      |      | √    |      |      |      |      |      |      |      |      |      |      |      | √    | √    | √    | √    | √    | √    | √    | √    | √ | √ | √ | √ | √ | √ | √ | √ | √ | √ | √ |   |   |   |   |   |   |
| 73-t2 |     |     | √    |      |      |      | √    |      |      |      |      |      |      |      | √    | √    | √    | √    | √    | √    |      |      |      |      | √    |      |      |      |      |      |      |      |      |      |      |      | √    | √    | √    | √    | √    | √    | √    | √    | √ | √ | √ | √ | √ | √ | √ | √ | √ | √ | √ | √ |   |   |   |   |   |
| 84-t2 |     |     | √    |      |      |      | √    |      |      |      |      |      |      |      | √    | √    | √    | √    | √    | √    |      |      |      |      | √    |      |      |      |      |      |      |      |      |      |      |      | √    | √    | √    | √    | √    | √    | √    | √    | √ | √ | √ | √ | √ | √ | √ | √ | √ | √ | √ | √ | √ |   |   |   |   |
| 9-t3  |     |     | √    |      |      |      | √    |      |      |      |      |      |      |      | √    | √    | √    | √    | √    | √    |      |      |      |      | √    |      |      |      |      |      |      |      |      |      |      | √    | √    | √    | √    | √    | √    | √    | √    | √    | √ | √ | √ | √ | √ | √ | √ | √ | √ | √ | √ | √ |   |   |   |   |   |
| 66-t3 | √   |     | √    |      |      |      | √    |      |      |      |      |      |      |      | √    | √    | √    | √    | √    | √    |      |      |      |      | √    |      |      |      |      |      |      |      |      |      |      | √    | √    | √    | √    | √    | √    | √    | √    | √    | √ | √ | √ | √ | √ | √ | √ | √ | √ | √ | √ | √ | √ |   |   |   |   |
| 68-t3 |     |     | √    |      |      |      | √    |      |      |      |      |      |      |      | √    | √    | √    | √    | √    | √    |      |      |      |      | √    |      |      |      |      |      |      |      |      |      |      |      | √    | √    | √    | √    | √    | √    | √    | √    | √ | √ | √ | √ | √ | √ | √ | √ | √ | √ | √ | √ | √ | √ |   |   |   |
| 71-t3 |     |     | √    |      |      |      | √    |      |      |      |      |      |      |      | √    | √    | √    | √    | √    | √    |      |      |      |      | √    |      |      |      |      |      |      |      |      |      |      |      | √    | √    | √    | √    | √    | √    | √    | √    | √ | √ | √ | √ | √ | √ | √ | √ | √ | √ | √ | √ | √ | √ |   |   |   |
| 73-t3 |     |     | √    |      |      |      | √    |      |      |      |      |      |      |      | √    | √    | √    | √    | √    | √    |      |      |      |      | √    |      |      |      |      |      |      |      |      |      |      |      | √    | √    | √    | √    | √    | √    | √    | √    | √ | √ | √ | √ | √ | √ | √ | √ | √ | √ | √ | √ | √ | √ | √ |   |   |
| 84-t3 |     |     | √    |      |      |      | √    |      |      |      |      |      |      |      | √    | √    | √    | √    | √    | √    |      |      |      |      | √    |      |      |      |      |      |      |      |      |      |      |      | √    | √    | √    | √    | √    | √    | √    | √    | √ | √ | √ | √ | √ | √ | √ | √ | √ | √ | √ | √ | √ | √ | √ | √ | √ |

Key to get the correct residue numbers of the Human LH2 enzyme: (Residue Number in table) + 538 = correct number. *Example: H128 + 538 = H666*



**Table S18.** Residues involved in all the possible O<sub>2</sub>-transporting tunnels for the LH2-c24. The “√” shows the presence of the residue in the tunnel of interest.

| c24   | P23 | F11 | V11 | V11 | K11 | Y11 | S11 | P11 | R12 | O12 | R12 | S12 | L12 | R12 | P12 | H12 | H12 | D13 | T13 | L13 | N13 | A13 | V14 | E14 | O14 | G14 | G15 | G15 | C15 | K15 | F15 | I16 | E16 | S16 | P16 | F17 | H17 | H18 | E18 | G18 | L18 | P18 | V18 | K18 | R19 | I19 | V19 | F19 |  |   |   |   |   |   |   |   |   |   |   |   |   |
|-------|-----|-----|-----|-----|-----|-----|-----|-----|-----|-----|-----|-----|-----|-----|-----|-----|-----|-----|-----|-----|-----|-----|-----|-----|-----|-----|-----|-----|-----|-----|-----|-----|-----|-----|-----|-----|-----|-----|-----|-----|-----|-----|-----|-----|-----|-----|-----|-----|--|---|---|---|---|---|---|---|---|---|---|---|---|
| 23-t1 |     |     |     |     |     |     |     |     |     |     |     |     |     |     |     | √   | √   |     | √   | √   | √   |     |     |     |     |     |     |     |     |     |     |     |     |     |     |     |     |     |     |     |     |     |     |     |     |     |     |     |  | √ | √ | √ | √ |   |   |   |   |   |   |   |   |
| 25-t1 |     |     |     |     |     |     | √   |     |     |     |     |     |     |     |     |     | √   | √   | √   | √   | √   |     |     |     |     |     |     |     |     | √   |     |     |     |     |     |     |     |     |     |     |     |     |     |     |     |     |     |     |  |   |   |   | √ | √ | √ | √ |   |   |   |   |   |
| 26-t1 |     |     |     |     |     |     |     |     |     |     |     |     |     |     |     |     |     | √   | √   | √   | √   |     |     |     |     |     |     |     |     |     |     |     |     |     |     |     |     |     |     |     |     |     |     |     |     |     |     |     |  |   |   |   |   |   | √ | √ | √ | √ |   |   |   |
| 29-t1 |     |     | √   |     |     | √   |     |     |     |     |     |     |     |     | √   |     | √   | √   | √   | √   | √   |     |     |     |     |     |     |     |     | √   |     |     |     |     |     |     |     |     |     |     |     |     |     |     |     |     |     |     |  |   |   |   |   | √ | √ | √ | √ |   |   |   |   |
| 61-t1 |     |     | √   |     |     |     | √   |     |     |     |     |     |     |     |     | √   |     |     | √   | √   | √   |     |     |     |     |     |     |     |     | √   |     |     |     |     |     |     |     |     |     |     |     |     |     |     |     |     |     |     |  |   |   |   |   | √ | √ | √ | √ |   |   |   |   |
| 81-t1 |     |     | √   |     |     | √   |     |     |     |     |     |     |     |     |     | √   |     |     | √   | √   | √   |     |     |     |     |     |     |     |     | √   |     |     |     |     |     |     |     |     |     |     |     |     |     |     |     |     |     |     |  |   |   |   |   |   | √ | √ | √ | √ |   |   |   |
| 23-t2 |     |     | √   |     |     | √   |     |     |     |     |     |     |     |     |     |     | √   | √   | √   | √   | √   |     |     |     |     |     |     |     |     |     | √   |     |     |     |     |     |     |     |     |     |     |     |     |     |     |     |     |     |  |   |   |   |   |   | √ | √ | √ | √ |   |   |   |
| 25-t2 |     |     | √   |     |     |     |     |     |     |     |     |     |     |     |     |     | √   | √   | √   | √   | √   |     |     |     |     |     |     |     |     |     | √   |     |     |     |     |     |     |     |     |     |     |     |     |     |     |     |     |     |  |   |   |   |   |   |   | √ | √ | √ | √ |   |   |
| 26-t2 |     |     |     |     |     |     |     |     |     |     |     |     |     |     |     |     |     | √   | √   | √   | √   |     |     |     |     |     |     |     |     |     |     |     |     |     |     |     |     |     |     |     |     |     |     |     |     |     |     |     |  |   |   |   |   |   |   |   | √ | √ | √ | √ |   |
| 29-t2 |     |     |     |     |     | √   |     |     |     |     |     |     |     |     |     |     | √   | √   | √   | √   | √   |     |     |     |     |     |     |     |     |     | √   |     |     |     |     |     |     |     |     |     |     |     |     |     |     |     |     |     |  |   |   |   |   |   |   | √ | √ | √ | √ |   |   |
| 61-t2 |     |     | √   |     |     | √   |     |     |     |     |     |     |     |     |     |     | √   | √   | √   | √   | √   |     |     |     |     |     |     |     |     |     | √   |     |     |     |     |     |     |     |     |     |     |     |     |     |     |     |     |     |  |   |   |   |   |   |   |   | √ | √ | √ | √ |   |
| 81-t2 |     |     | √   |     |     | √   |     |     |     |     |     |     |     |     |     |     | √   | √   | √   | √   | √   |     |     |     |     |     |     |     |     |     | √   |     |     |     |     |     |     |     |     |     |     |     |     |     |     |     |     |     |  |   |   |   |   |   |   |   | √ | √ | √ | √ |   |
| 23-t3 |     |     | √   |     |     | √   |     |     |     |     |     |     |     |     |     |     | √   | √   | √   | √   | √   |     |     |     |     |     |     |     |     |     | √   |     |     |     |     |     |     |     |     |     |     |     |     |     |     |     |     |     |  |   |   |   |   |   |   |   | √ | √ | √ | √ |   |
| 25-t3 |     |     | √   |     |     | √   |     |     |     |     |     |     |     |     |     |     | √   | √   | √   | √   | √   |     |     |     |     |     |     |     |     |     | √   |     |     |     |     |     |     |     |     |     |     |     |     |     |     |     |     |     |  |   |   |   |   |   |   |   |   | √ | √ | √ | √ |
| 26-t3 |     | √   |     |     |     |     |     |     |     |     |     |     |     |     |     |     |     | √   | √   | √   | √   |     |     |     |     |     |     |     |     |     |     |     |     |     |     |     |     |     |     |     |     |     |     |     |     |     |     |     |  |   |   |   |   |   |   |   |   | √ | √ | √ | √ |
| 29-t3 |     |     |     |     |     | √   |     |     |     |     |     |     |     |     |     |     | √   | √   | √   | √   | √   |     |     |     |     |     |     |     |     |     | √   |     |     |     |     |     |     |     |     |     |     |     |     |     |     |     |     |     |  |   |   |   |   |   |   |   |   | √ | √ | √ | √ |
| 61-t3 |     |     | √   |     |     | √   |     |     |     |     |     |     |     |     |     |     | √   | √   | √   | √   | √   |     |     |     |     |     |     |     |     |     | √   |     |     |     |     |     |     |     |     |     |     |     |     |     |     |     |     |     |  |   |   |   |   |   |   |   |   | √ | √ | √ | √ |
| 81-t3 |     |     | √   |     |     | √   |     |     |     |     |     |     |     |     |     |     | √   | √   | √   | √   | √   |     |     |     |     |     |     |     |     |     | √   |     |     |     |     |     |     |     |     |     |     |     |     |     |     |     |     |     |  |   |   |   |   |   |   |   |   | √ | √ | √ | √ |

Key to get the correct residue numbers of the Human LH2 enzyme: (Residue Number in table) + 538 = correct number. *Example: H128 + 538 = H666*

**Table S19.** Residues involved in all the possible O<sub>2</sub>-transporting tunnels for the LH2-c25. The “√” shows the presence of the residue in the tunnel of interest.

| c25   | F113 | V115 | K116 | Y117 | P119 | R121 | Q122 | R123 | S124 | L125 | H128 | H129 | D130 | T135 | I136 | N137 | I138 | A139 | V143 | F147 | G149 | G150 | G151 | C152 | K153 | F154 | I161 | E162 | S163 | P164 | F170 | H172 | H180 | E181 | G182 | L183 | P184 | V185 | K186 | R190 | I192 | V194 | F196 |   |  |  |
|-------|------|------|------|------|------|------|------|------|------|------|------|------|------|------|------|------|------|------|------|------|------|------|------|------|------|------|------|------|------|------|------|------|------|------|------|------|------|------|------|------|------|------|------|---|--|--|
| 39-t1 | √    | √    |      | √    |      |      |      |      |      | √    | √    |      | √    | √    |      | √    |      |      |      |      |      |      | √    | √    |      |      |      |      |      |      |      |      | √    | √    | √    |      |      |      |      |      |      | √    |      |   |  |  |
| 51-t1 | √    | √    |      |      |      |      |      |      |      |      | √    |      | √    | √    |      | √    |      |      |      |      |      |      |      |      | √    | √    |      |      |      |      |      |      |      | √    | √    | √    |      |      |      |      |      |      | √    |   |  |  |
| 72-t1 | √    | √    |      | √    |      |      |      |      |      |      | √    |      | √    | √    |      | √    |      |      |      |      |      |      |      |      | √    | √    |      |      |      |      |      |      |      | √    | √    | √    |      |      |      |      |      |      | √    |   |  |  |
| 80-t1 | √    | √    |      | √    |      |      |      |      |      |      | √    |      | √    | √    |      | √    |      |      |      |      |      |      |      |      | √    | √    |      |      |      |      |      |      |      | √    | √    | √    |      |      |      |      |      |      | √    |   |  |  |
| 83-t1 | √    | √    |      | √    |      |      |      |      |      |      | √    |      | √    | √    |      | √    |      |      |      |      |      |      |      |      | √    | √    |      |      |      |      |      |      |      | √    | √    | √    |      |      |      |      |      |      | √    |   |  |  |
| 86-t1 | √    | √    |      | √    |      |      |      |      |      |      | √    |      | √    | √    |      | √    |      |      |      |      |      |      |      |      | √    | √    |      |      |      |      |      |      |      | √    | √    | √    |      |      |      |      |      |      | √    |   |  |  |
| 39-t2 | √    | √    |      | √    |      |      |      |      | √    |      | √    |      | √    | √    |      | √    |      |      |      |      |      |      | √    | √    |      | √    | √    |      |      |      |      |      |      | √    | √    | √    |      |      |      |      |      |      | √    |   |  |  |
| 51-t2 | √    | √    |      |      |      |      |      | √    |      |      | √    |      | √    | √    |      | √    |      |      |      |      |      |      |      | √    | √    |      | √    | √    |      |      |      |      |      |      | √    | √    | √    |      |      |      |      |      |      | √ |  |  |
| 72-t2 | √    | √    |      | √    |      |      |      | √    |      |      | √    |      | √    | √    |      | √    |      |      |      |      |      |      |      | √    | √    |      | √    | √    |      |      |      |      |      |      | √    | √    | √    |      |      |      |      |      |      | √ |  |  |
| 80-t2 | √    | √    |      | √    |      |      |      |      |      |      | √    |      | √    | √    |      | √    |      |      |      |      |      |      |      | √    | √    |      | √    | √    |      |      |      |      |      |      | √    | √    | √    |      |      |      |      |      |      | √ |  |  |
| 83-t2 | √    | √    |      | √    |      |      |      |      |      |      | √    |      | √    | √    |      | √    |      |      |      |      |      |      |      | √    | √    |      | √    | √    |      |      |      |      |      |      | √    | √    | √    |      |      |      |      |      |      | √ |  |  |
| 86-t2 | √    | √    |      | √    |      |      |      |      |      |      | √    |      | √    | √    |      | √    |      |      |      |      |      |      |      | √    | √    |      | √    | √    |      |      |      |      |      |      | √    | √    | √    |      |      |      |      |      |      | √ |  |  |
| 39-t3 | √    | √    |      | √    |      |      |      |      |      |      | √    |      | √    | √    |      | √    |      |      |      |      |      |      |      | √    | √    |      | √    | √    |      |      |      |      |      |      | √    | √    | √    |      |      |      |      |      |      | √ |  |  |
| 51-t3 | √    | √    |      | √    |      |      |      |      |      |      | √    |      | √    | √    |      | √    |      |      |      |      |      |      |      | √    | √    |      | √    | √    |      |      |      |      |      |      | √    | √    | √    |      |      |      |      |      |      | √ |  |  |
| 72-t3 | √    | √    |      | √    |      |      |      |      |      |      | √    |      | √    | √    |      | √    |      |      |      |      |      |      |      | √    | √    |      | √    | √    |      |      |      |      |      |      | √    | √    | √    |      |      |      |      |      |      | √ |  |  |
| 83-t3 | √    | √    |      | √    |      |      |      |      |      |      | √    |      | √    | √    |      | √    |      |      |      |      |      |      |      | √    | √    |      | √    | √    |      |      |      |      |      |      | √    | √    | √    |      |      |      |      |      |      | √ |  |  |
| 86-t3 | √    | √    |      | √    |      |      |      |      |      |      | √    |      | √    | √    |      | √    |      |      |      |      |      |      |      | √    | √    |      | √    | √    |      |      |      |      |      |      | √    | √    | √    |      |      |      |      |      |      | √ |  |  |

Key to get the correct residue numbers of the Human LH2 enzyme: (Residue Number in table) + 538 = correct number. *Example: H128 + 538 = H666*
